# Supplementary material for: Chagas Disease Megaesophagus Patients Carrying Variant MRPS18B P260A Display Nitro-Oxidative Stress and Mitochondrial Dysfunction in Response to IFN-γ Stimulus
Source: MDPI journal article supplement (doi:10.3390/biomedicines10092215), 2022-09-07
Supplement: s1 [file s1]

**Supplemental Table S1:** List of the genes contained in the Mitochondrion Gene Ontology term and Mitocarta 2.0.

| Gene   | EnsemblID       | Name                                                              |
|--------|-----------------|-------------------------------------------------------------------|
| AADAT  | ENSG00000109576 | aminoadipate aminotransferase                                     |
| AARS2  | ENSG00000124608 | alanyl-tRNA synthetase 2 mitochondrial                            |
| AASS   | ENSG00000008311 | aminoadipate-semialdehyde synthase                                |
| ABAT   | ENSG00000183044 | 4-aminobutyrate aminotransferase                                  |
| ABCA13 | ENSG00000179869 | ATP binding cassette subfamily A member 13                        |
| ABCA9  | ENSG00000154258 | ATP binding cassette subfamily A member 9                         |
| ABCB10 | ENSG00000135776 | ATP binding cassette subfamily B member 10                        |
| ABCB6  | ENSG00000115657 | ATP binding cassette subfamily B member 6 (Langereis blood group) |
| ABCB7  | ENSG00000131269 | ATP binding cassette subfamily B member 7                         |
| ABCB8  | ENSG00000197150 | ATP binding cassette subfamily B member 8                         |
| ABCB9  | ENSG00000150967 | ATP binding cassette subfamily B member 9                         |
| ABCD1  | ENSG00000101986 | ATP binding cassette subfamily D member 1                         |
| ABCD2  | ENSG00000173208 | ATP binding cassette subfamily D member 2                         |
| ABCD3  | ENSG00000117528 | ATP binding cassette subfamily D member 3                         |
| ABCE1  | ENSG00000164163 | ATP binding cassette subfamily E member 1                         |
| ABCF2  | ENSG00000033050 | ATP binding cassette subfamily F member 2                         |
| ABCG1  | ENSG00000160179 | ATP binding cassette subfamily G member 1                         |
| ABCG2  | ENSG00000118777 | ATP binding cassette subfamily G member 2 (Junior blood group)    |
| ABHD10 | ENSG00000144827 | abhydrolase domain containing 10 depalmitoylase                   |
| ABHD11 | ENSG00000106077 | abhydrolase domain containing 11                                  |
| ABHD6  | ENSG00000163686 | abhydrolase domain containing 6 acylglycerol lipase               |
| ABL1   | ENSG00000097007 | ABL proto-oncogene 1 non-receptor tyrosine kinase                 |
| ACAA1  | ENSG00000060971 | acetyl-CoA acyltransferase 1                                      |
| ACAA2  | ENSG00000167315 | acetyl-CoA acyltransferase 2                                      |
| ACACA  | ENSG00000278540 | acetyl-CoA carboxylase alpha                                      |
| ACACB  | ENSG00000076555 | acetyl-CoA carboxylase beta                                       |
| ACAD10 | ENSG00000111271 | acyl-CoA dehydrogenase family member 10                           |
| ACAD11 | ENSG00000240303 | acyl-CoA dehydrogenase family member 11                           |
| ACAD8  | ENSG00000151498 | acyl-CoA dehydrogenase family member 8                            |
| ACAD9  | ENSG00000177646 | acyl-CoA dehydrogenase family member 9                            |
| ACADL  | ENSG00000115361 | acyl-CoA dehydrogenase long chain                                 |
| ACADM  | ENSG00000117054 | acyl-CoA dehydrogenase medium chain                               |
| ACADS  | ENSG00000122971 | acyl-CoA dehydrogenase short chain                                |
| ACADSB | ENSG00000196177 | acyl-CoA dehydrogenase short/branched chain                       |
| ACADVL | ENSG00000072778 | acyl-CoA dehydrogenase very long chain                            |
| ACAT1  | ENSG00000075239 | acetyl-CoA acetyltransferase 1                                    |
| ACBD3  | ENSG00000182827 | acyl-CoA binding domain containing 3                              |
| ACCS   | ENSG00000110455 | 1-aminocyclopropane-1-carboxylate synthase homolog (inactive)     |
| ACLY   | ENSG00000131473 | ATP citrate lyase                                                 |
| ACN9   | ENSG00000196636 | succinate dehydrogenase complex assembly factor 3                 |
| ACO1   | ENSG00000122729 | aconitase 1                                                       |
| ACO1   | ENSG00000122729 | aconitase 1                                                       |
| ACO2   | ENSG00000100412 | aconitase 2                                                       |
| ACOT2  | ENSG00000119673 | acyl-CoA thioesterase 2                                           |
| ACOT7  | ENSG00000097021 | acyl-CoA thioesterase 7                                           |
| ACOT8  | ENSG00000101473 | acyl-CoA thioesterase 8                                           |

|         |                 |                                                                |
|---------|-----------------|----------------------------------------------------------------|
| ACOT9   | ENSG00000123130 | acyl-CoA thioesterase 9                                        |
| ACOX1   | ENSG00000161533 | acyl-CoA oxidase 1                                             |
| ACOX3   | ENSG00000087008 | acyl-CoA oxidase 3 pristanoyl                                  |
| ACP6    | ENSG00000162836 | acid phosphatase 6 lysophosphatidic                            |
| ACSBG2  | ENSG00000130377 | acyl-CoA synthetase bubblegum family member 2                  |
| ACSF2   | ENSG00000167107 | acyl-CoA synthetase family member 2                            |
| ACSF3   | ENSG00000176715 | acyl-CoA synthetase family member 3                            |
| ACSL1   | ENSG00000151726 | acyl-CoA synthetase long chain family member 1                 |
| ACSL4   | ENSG00000068366 | acyl-CoA synthetase long chain family member 4                 |
| ACSL5   | ENSG00000197142 | acyl-CoA synthetase long chain family member 5                 |
| ACSL6   | ENSG00000164398 | acyl-CoA synthetase long chain family member 6                 |
| ACSM1   | ENSG00000166743 | acyl-CoA synthetase medium chain family member 1               |
| ACSM2A  | ENSG00000183747 | acyl-CoA synthetase medium chain family member 2A              |
| ACSM2B  | ENSG00000066813 | acyl-CoA synthetase medium chain family member 2B              |
| ACSM3   | ENSG00000005187 | acyl-CoA synthetase medium chain family member 3               |
| ACSM4   | ENSG00000215009 | acyl-CoA synthetase medium chain family member 4               |
| ACSM6   | ENSG00000173124 | acyl-CoA synthetase medium chain family member 6               |
| ACSS1   | ENSG00000154930 | acyl-CoA synthetase short chain family member 1                |
| ACSS3   | ENSG00000111058 | acyl-CoA synthetase short chain family member 3                |
| ACYP2   | ENSG00000170634 | acylphosphatase 2                                              |
| ADCK1   | ENSG00000063761 | aarF domain containing kinase 1                                |
| ADCK2   | ENSG00000133597 | aarF domain containing kinase 2                                |
| ADCK3   | ENSG00000163050 | coenzyme Q8A                                                   |
| ADCK4   | ENSG00000123815 | coenzyme Q8B                                                   |
| ADCK5   | ENSG00000173137 | aarF domain containing kinase 5                                |
| ADCY10  | ENSG00000143199 | adenylate cyclase 10                                           |
| ADH5    | ENSG00000197894 | alcohol dehydrogenase 5 (class III) chi polypeptide            |
| ADHFE1  | ENSG00000147576 | alcohol dehydrogenase iron containing 1                        |
| ADO     | ENSG00000181915 | 2-aminoethanethiol dioxygenase                                 |
| ADPRHL2 | ENSG00000116863 | ADP-ribosylserine hydrolase                                    |
| ADSL    | ENSG00000239900 | adenylosuccinate lyase                                         |
| AFF4    | ENSG00000072364 | ALF transcription elongation factor 4                          |
| AFG3L2  | ENSG00000141385 | AFG3 like matrix AAA peptidase subunit 2                       |
| AGAP2   | ENSG00000135439 | ArfGAP with GTPase domain ankyrin repeat and PH domain 2       |
| AGK     | ENSG00000006530 | acylglycerol kinase                                            |
| AGMAT   | ENSG00000116771 | agmatinase                                                     |
| AGPAT5  | ENSG00000155189 | 1-acylglycerol-3-phosphate O-acyltransferase 5                 |
| AGPS    | ENSG00000018510 | alkylglycerone phosphate synthase                              |
| AGR2    | ENSG00000106541 | anterior gradient 2 protein disulphide isomerase family member |
| AGTPBP1 | ENSG00000135049 | ATP/GTP binding carboxypeptidase 1                             |
| AGXT    | ENSG00000172482 | alanine--glyoxylate aminotransferase                           |
| AGXT2   | ENSG00000113492 | alanine--glyoxylate aminotransferase 2                         |
| AHCYL1  | ENSG00000168710 | adenosylhomocysteinase like 1                                  |
| AIFM1   | ENSG00000156709 | apoptosis inducing factor mitochondria associated 1            |
| AIFM2   | ENSG00000042286 | apoptosis inducing factor mitochondria associated 2            |
| AIFM3   | ENSG00000183773 | apoptosis inducing factor mitochondria associated 3            |
| AK2     | ENSG00000004455 | adenylate kinase 2                                             |
| AK3     | ENSG00000147853 | adenylate kinase 3                                             |
| AK4     | ENSG00000162433 | adenylate kinase 4                                             |
| AKAP1   | ENSG00000121057 | A-kinase anchoring protein 1                                   |
| AKAP10  | ENSG00000108599 | A-kinase anchoring protein 10                                  |
| AKAP8   | ENSG00000105127 | A-kinase anchoring protein 8                                   |

|          |                 |                                                                                    |
|----------|-----------------|------------------------------------------------------------------------------------|
| AKR1B10  | ENSG00000198074 | aldo-keto reductase family 1 member B10                                            |
| AKR7A2   | ENSG00000053371 | aldo-keto reductase family 7 member A2                                             |
| AKT1     | ENSG00000142208 | AKT serine/threonine kinase 1                                                      |
| ALAS1    | ENSG00000023330 | 5'-aminolevulinate synthase 1                                                      |
| ALAS2    | ENSG00000158578 | 5'-aminolevulinate synthase 2                                                      |
| ALDH18A1 | ENSG00000059573 | aldehyde dehydrogenase 18 family member A1                                         |
| ALDH1B1  | ENSG00000137124 | aldehyde dehydrogenase 1 family member B1                                          |
| ALDH1L1  | ENSG00000144908 | aldehyde dehydrogenase 1 family member L1                                          |
| ALDH1L2  | ENSG00000136010 | aldehyde dehydrogenase 1 family member L2                                          |
| ALDH2    | ENSG00000111275 | aldehyde dehydrogenase 2 family member                                             |
| ALDH3A2  | ENSG00000072210 | aldehyde dehydrogenase 3 family member A2                                          |
| ALDH4A1  | ENSG00000159423 | aldehyde dehydrogenase 4 family member A1                                          |
| ALDH5A1  | ENSG00000112294 | aldehyde dehydrogenase 5 family member A1                                          |
| ALDH6A1  | ENSG00000119711 | aldehyde dehydrogenase 6 family member A1                                          |
| ALDH7A1  | ENSG00000164904 | aldehyde dehydrogenase 7 family member A1                                          |
| ALDH9A1  | ENSG00000143149 | aldehyde dehydrogenase 9 family member A1                                          |
| ALDOC    | ENSG00000109107 | aldolase fructose-bisphosphate C                                                   |
| ALKBH1   | ENSG00000100601 | alkB homolog 1 histone H2A dioxygenase                                             |
| ALKBH3   | ENSG00000166199 | alkB homolog 3 alpha-ketoglutarate dependent dioxygenase                           |
| AMACR    | ENSG00000242110 | alpha-methylacyl-CoA racemase                                                      |
| AMT      | ENSG00000145020 | aminomethyltransferase                                                             |
| ANGEL2   | ENSG00000174606 | angel homolog 2                                                                    |
| ANXA10   | ENSG00000109511 | annexin A10                                                                        |
| AP2M1    | ENSG00000161203 | adaptor related protein complex 2 subunit mu 1                                     |
| APEX1    | ENSG00000100823 | apurinic/aprimidinic endodeoxyribonuclease 1                                       |
| APEX2    | ENSG00000169188 | apurinic/aprimidinic endodeoxyribonuclease 2                                       |
| APOA1BP  | ENSG00000163382 | NAD(P)HX epimerase                                                                 |
| APOO     | ENSG00000184831 | apolipoprotein O                                                                   |
| APOOL    | ENSG00000155008 | apolipoprotein O like                                                              |
| APOPT1   | ENSG00000256053 | cytochrome c oxidase assembly factor 8                                             |
| ARAF     | ENSG00000078061 | A-Raf proto-oncogene serine/threonine kinase                                       |
| ARF5     | ENSG00000004059 | ADP ribosylation factor 5                                                          |
| ARG2     | ENSG00000081181 | arginase 2                                                                         |
| ARGLU1   | ENSG00000134884 | arginine and glutamate rich 1                                                      |
| ARL2     | ENSG00000213465 | ADP ribosylation factor like GTPase 2                                              |
| ARMC1    | ENSG00000104442 | armadillo repeat containing 1                                                      |
| ARMC10   | ENSG00000170632 | armadillo repeat containing 10                                                     |
| ARMS2    | ENSG00000254636 | age-related maculopathy susceptibility 2                                           |
| ARSB     | ENSG00000113273 | arylsulfatase B                                                                    |
| AS3MT    | ENSG00000214435 | arsenite methyltransferase                                                         |
| ASAH2    | ENSG00000188611 | N-acylsphingosine amidohydrolase 2                                                 |
| ASB9     | ENSG00000102048 | ankyrin repeat and SOCS box containing 9                                           |
| ATAD1    | ENSG00000138138 | ATPase family AAA domain containing 1                                              |
| ATAD3A   | ENSG00000197785 | ATPase family AAA domain containing 3A                                             |
| ATAD3B   | ENSG00000160072 | ATPase family AAA domain containing 3B                                             |
| ATCAY    | ENSG00000167654 | ATCAY kinesin light chain interacting caytaxin                                     |
| ATG4D    | ENSG00000130734 | autophagy related 4D cysteine peptidase                                            |
| ATIC     | ENSG00000138363 | 5-aminoimidazole-4-carboxamide ribonucleotide formyltransferase/IMP cyclohydrolase |
| ATP10D   | ENSG00000145246 | ATPase phospholipid transporting 10D (putative)                                    |
| ATP5A1   | ENSG00000152234 | ATP synthase F1 subunit alpha                                                      |
| ATP5B    | ENSG00000110955 | ATP synthase F1 subunit beta                                                       |

|              |                 |                                                                 |
|--------------|-----------------|-----------------------------------------------------------------|
| ATP5C1       | ENSG00000165629 | ATP synthase F1 subunit gamma                                   |
| ATP5D        | ENSG00000099624 | ATP synthase F1 subunit delta                                   |
| ATP5EP2      | ENSG00000180389 | ATP synthase F1 subunit epsilon pseudogene 2                    |
| ATP5F1       | ENSG00000116459 | ATP synthase peripheral stalk-membrane subunit b                |
| ATP5G1       | ENSG00000159199 | ATP synthase membrane subunit c locus 1                         |
| ATP5G2       | ENSG00000135390 | ATP synthase membrane subunit c locus 2                         |
| ATP5G3       | ENSG00000154518 | ATP synthase membrane subunit c locus 3                         |
| ATP5H        | ENSG00000167863 | ATP synthase peripheral stalk subunit d                         |
| ATP5I        | ENSG00000169020 | ATP synthase membrane subunit e                                 |
| ATP5J        | ENSG00000154723 | ATP synthase peripheral stalk subunit F6                        |
| ATP5J2-PTCD1 | ENSG00000248919 | ATP5MF-PTCD1 readthrough                                        |
| ATP5L        | ENSG00000167283 | ATP synthase membrane subunit g                                 |
| ATP5O        | ENSG00000241837 | ATP synthase peripheral stalk subunit OSCP                      |
| ATP5S        | ENSG00000125375 | distal membrane arm assembly component 2 like                   |
| ATP5SL       | ENSG00000105341 | distal membrane arm assembly component 2                        |
| ATP6V1A      | ENSG00000114573 | ATPase H <sup>+</sup> transporting V1 subunit A                 |
| ATP6V1E1     | ENSG00000131100 | ATPase H <sup>+</sup> transporting V1 subunit E1                |
| ATP7B        | ENSG00000123191 | ATPase copper transporting beta                                 |
| ATPAF1       | ENSG00000123472 | ATP synthase mitochondrial F1 complex assembly factor 1         |
| ATPAF2       | ENSG00000171953 | ATP synthase mitochondrial F1 complex assembly factor 2         |
| ATPIF1       | ENSG00000130770 | ATP synthase inhibitory factor subunit 1                        |
| ATRX         | ENSG00000085224 | ATRX chromatin remodeler                                        |
| ATXN2        | ENSG00000204842 | ataxin 2                                                        |
| AUH          | ENSG00000148090 | AU RNA binding methylglutaconyl-CoA hydratase                   |
| AZIN2        | ENSG00000142920 | antizyme inhibitor 2                                            |
| BAD          | ENSG00000002330 | BCL2 associated agonist of cell death                           |
| BAG5         | ENSG00000166170 | BAG cochaperone 5                                               |
| BAK1         | ENSG00000030110 | BCL2 antagonist/killer 1                                        |
| BARX2        | ENSG00000043039 | BARX homeobox 2                                                 |
| BAX          | ENSG00000087088 | BCL2 associated X apoptosis regulator                           |
| BBC3         | ENSG00000105327 | BCL2 binding component 3                                        |
| BBOX1        | ENSG00000129151 | gamma-butyrobetaine hydroxylase 1                               |
| BCAT1        | ENSG00000060982 | branched chain amino acid transaminase 1                        |
| BCAT2        | ENSG00000105552 | branched chain amino acid transaminase 2                        |
| BCKDHA       | ENSG00000248098 | branched chain keto acid dehydrogenase E1 subunit alpha         |
| BCKDHB       | ENSG00000083123 | branched chain keto acid dehydrogenase E1 subunit beta          |
| BCKDK        | ENSG00000103507 | branched chain keto acid dehydrogenase kinase                   |
| BCL2         | ENSG00000171791 | BCL2 apoptosis regulator                                        |
| BCL2L1       | ENSG00000171552 | BCL2 like 1                                                     |
| BCL2L10      | ENSG00000137875 | BCL2 like 10                                                    |
| BCL2L11      | ENSG00000153094 | BCL2 like 11                                                    |
| BCL2L13      | ENSG00000099968 | BCL2 like 13                                                    |
| BCL2L2       | ENSG00000129473 | BCL2 like 2                                                     |
| BCLAF3       | ENSG00000173681 | BCLAF1 and THRAP3 family member 3                               |
| BCO2         | ENSG00000197580 | beta-carotene oxygenase 2                                       |
| BCS1L        | ENSG00000074582 | BCS1 homolog ubiquinol-cytochrome c reductase complex chaperone |
| BDH1         | ENSG00000161267 | 3-hydroxybutyrate dehydrogenase 1                               |
| BDH2         | ENSG00000164039 | 3-hydroxybutyrate dehydrogenase 2                               |
| BFSP1        | ENSG00000125864 | beaded filament structural protein 1                            |
| BID          | ENSG00000015475 | BH3 interacting domain death agonist                            |
| BLID         | ENSG00000259571 | BH3-like motif containing cell death inducer                    |

|           |                 |                                                                     |
|-----------|-----------------|---------------------------------------------------------------------|
| BLOC1S1   | ENSG00000135441 | biogenesis of lysosomal organelles complex 1 subunit 1              |
| BLOC1S2   | ENSG00000196072 | biogenesis of lysosomal organelles complex 1 subunit 2              |
| BNIP1     | ENSG00000113734 | BCL2 interacting protein 1                                          |
| BNIP3     | ENSG00000176171 | BCL2 interacting protein 3                                          |
| BNIP3L    | ENSG00000104765 | BCL2 interacting protein 3 like                                     |
| BOK       | ENSG00000176720 | BCL2 family apoptosis regulator BOK                                 |
| BOLA1     | ENSG00000178096 | bolA family member 1                                                |
| BPHL      | ENSG00000137274 | biphenyl hydrolase like                                             |
| BRAF      | ENSG00000157764 | B-Raf proto-oncogene serine/threonine kinase                        |
| BRD8      | ENSG00000112983 | bromodomain containing 8                                            |
| BRINP3    | ENSG00000162670 | BMP/retinoic acid inducible neural specific 3                       |
| BSG       | ENSG00000172270 | basigin (Ok blood group)                                            |
| BZRAP1    | ENSG00000005379 | TSPO associated protein 1                                           |
| C10orf10  | ENSG00000165507 | DEPP autophagy regulator 1                                          |
| C10orf2   | ENSG00000107815 | twinkle mtDNA helicase                                              |
| C12orf10  | ENSG00000139637 | MYG1 exonuclease                                                    |
| C12orf65  | ENSG00000130921 | mitochondrial translation release factor in rescue                  |
| C14orf119 | ENSG00000179933 | chromosome 14 open reading frame 119                                |
| C14orf159 | ENSG00000133943 | D-glutamate cyclase                                                 |
| C14orf2   | ENSG00000156411 | ATP synthase membrane subunit j                                     |
| C15orf40  | ENSG00000169609 | chromosome 15 open reading frame 40                                 |
| C15orf48  | ENSG00000166920 | chromosome 15 open reading frame 48                                 |
| C15orf48  | ENSG00000166920 | chromosome 15 open reading frame 48                                 |
| C15orf61  | ENSG00000189227 | chromosome 15 open reading frame 61                                 |
| C15orf62  | ENSG00000188277 | chromosome 15 open reading frame 62                                 |
| C16orf91  | ENSG00000174109 | chromosome 16 open reading frame 91                                 |
| C17orf89  | ENSG00000224877 | NADH:ubiquinone oxidoreductase complex assembly factor 8            |
| C19orf12  | ENSG00000131943 | chromosome 19 open reading frame 12                                 |
| C19orf52  | ENSG00000142444 | translocase of inner mitochondrial membrane 29                      |
| C19orf70  | ENSG00000174917 | mitochondrial contact site and cristae organizing system subunit 13 |
| C1QBP     | ENSG00000108561 | complement C1q binding protein                                      |
| C20orf24  | ENSG00000101084 | RAB5 interacting factor                                             |
| C21orf33  | ENSG00000160221 | glutamine amidotransferase class 1 domain containing 3              |
| C2orf47   | ENSG00000162972 | matrix AAA peptidase interacting protein 1                          |
| C2orf69   | ENSG00000178074 | chromosome 2 open reading frame 69                                  |
| C3orf33   | ENSG00000174928 | chromosome 3 open reading frame 33                                  |
| C5orf63   | ENSG00000164241 | chromosome 5 open reading frame 63                                  |
| C6orf136  | ENSG00000204564 | chromosome 6 open reading frame 136                                 |
| C6orf203  | ENSG00000130349 | mitochondrial transcription rescue factor 1                         |
| C6orf57   | ENSG00000154079 | succinate dehydrogenase complex assembly factor 4                   |
| C7orf55   | ENSG00000164898 | formation of mitochondrial complex V assembly factor 1 homolog      |
| C8orf82   | ENSG00000213563 | chromosome 8 open reading frame 82                                  |
| CA5A      | ENSG00000174990 | carbonic anhydrase 5A                                               |
| CA5B      | ENSG00000169239 | carbonic anhydrase 5B                                               |
| CA5BP1    | ENSG00000186312 | carbonic anhydrase 5B pseudogene 1                                  |
| CAMK2A    | ENSG00000070808 | calcium/calmodulin dependent protein kinase II alpha                |
| CAPN10    | ENSG00000142330 | calpain 10                                                          |
| CAPRIN2   | ENSG00000110888 | caprin family member 2                                              |
| CARD19    | ENSG00000165233 | caspase recruitment domain family member 19                         |
| CARKD     | ENSG00000213995 | NAD(P)HX dehydratase                                                |
| CARS2     | ENSG00000134905 | cysteinyl-tRNA synthetase 2 mitochondrial                           |
| CASP2     | ENSG00000106144 | caspase 2                                                           |

|          |                 |                                                                      |
|----------|-----------------|----------------------------------------------------------------------|
| CASP4    | ENSG00000196954 | caspase 4                                                            |
| CASP8    | ENSG00000064012 | caspase 8                                                            |
| CASP8AP2 | ENSG00000118412 | caspase 8 associated protein 2                                       |
| CASP9    | ENSG00000132906 | caspase 9                                                            |
| CASQ1    | ENSG00000143318 | calsequestrin 1                                                      |
| CAT      | ENSG00000121691 | catalase                                                             |
| CBR3     | ENSG00000159231 | carbonyl reductase 3                                                 |
| CBR4     | ENSG00000145439 | carbonyl reductase 4                                                 |
| CCBL2    | ENSG00000137944 | kynurenine aminotransferase 3                                        |
| CCDC109B | ENSG00000005059 | mitochondrial calcium uniporter dominant negative subunit beta       |
| CCDC127  | ENSG00000164366 | coiled-coil domain containing 127                                    |
| CCDC136  | ENSG00000128596 | coiled-coil domain containing 136                                    |
| CCDC19   | ENSG00000213085 | cilia and flagella associated protein 45                             |
| CCDC51   | ENSG00000164051 | coiled-coil domain containing 51                                     |
| CCDC58   | ENSG00000160124 | mitochondrial matrix import factor 23                                |
| CCDC90B  | ENSG00000137500 | coiled-coil domain containing 90B                                    |
| CCT7     | ENSG00000135624 | chaperonin containing TCP1 subunit 7                                 |
| CD3EAP   | ENSG00000117877 | RNA polymerase I subunit G                                           |
| CDC25C   | ENSG00000158402 | cell division cycle 25C                                              |
| CDK1     | ENSG00000170312 | cyclin dependent kinase 1                                            |
| CDK7     | ENSG00000134058 | cyclin dependent kinase 7                                            |
| CDKN2A   | ENSG00000147889 | cyclin dependent kinase inhibitor 2A                                 |
| CECR5    | ENSG00000069998 | haloacid dehalogenase like hydrolase domain containing 5             |
| CEP89    | ENSG00000121289 | centrosomal protein 89                                               |
| CERK     | ENSG00000100422 | ceramide kinase                                                      |
| CHAT     | ENSG00000070748 | choline O-acetyltransferase                                          |
| CHCHD1   | ENSG00000172586 | coiled-coil-helix-coiled-coil-helix domain containing 1              |
| CHCHD10  | ENSG00000250479 | coiled-coil-helix-coiled-coil-helix domain containing 10             |
| CHCHD2P9 | ENSG00000186940 | coiled-coil-helix-coiled-coil-helix domain containing 2 pseudogene 9 |
| CHCHD3   | ENSG00000106554 | coiled-coil-helix-coiled-coil-helix domain containing 3              |
| CHCHD4   | ENSG00000163528 | coiled-coil-helix-coiled-coil-helix domain containing 4              |
| CHCHD5   | ENSG00000125611 | coiled-coil-helix-coiled-coil-helix domain containing 5              |
| CHCHD6   | ENSG00000159685 | coiled-coil-helix-coiled-coil-helix domain containing 6              |
| CHCHD7   | ENSG00000170791 | coiled-coil-helix-coiled-coil-helix domain containing 7              |
| CHDH     | ENSG00000016391 | choline dehydrogenase                                                |
| CHMP2B   | ENSG00000083937 | charged multivesicular body protein 2B                               |
| CHPF     | ENSG00000123989 | chondroitin polymerizing factor                                      |
| CHPT1    | ENSG00000111666 | choline phosphotransferase 1                                         |
| CIAPIN1  | ENSG00000005194 | cytokine induced apoptosis inhibitor 1                               |
| CIDEA    | ENSG00000176194 | cell death inducing DFFA like effector a                             |
| CISD1    | ENSG00000122873 | CDGSH iron sulfur domain 1                                           |
| CISD2    | ENSG00000145354 | CDGSH iron sulfur domain 2                                           |
| CISD3    | ENSG00000277972 | CDGSH iron sulfur domain 3                                           |
| CKB      | ENSG00000166165 | creatine kinase B                                                    |
| CKMT1B   | ENSG00000237289 | creatine kinase mitochondrial 1B                                     |
| CKMT2    | ENSG00000131730 | creatine kinase mitochondrial 2                                      |
| CLIC1    | ENSG00000213719 | chloride intracellular channel 1                                     |
| CLIC4    | ENSG00000169504 | chloride intracellular channel 4                                     |
| CLN3     | ENSG00000188603 | CLN3 lysosomal/endosomal transmembrane protein battenin              |
| CLN8     | ENSG00000182372 | CLN8 transmembrane ER and ERGIC protein                              |
| CLPB     | ENSG00000162129 | caseinolytic mitochondrial matrix peptidase chaperone subunit B      |
| CLPP     | ENSG00000125656 | caseinolytic mitochondrial matrix peptidase proteolytic subunit      |

|          |                 |                                                                       |
|----------|-----------------|-----------------------------------------------------------------------|
| CLPX     | ENSG00000166855 | caseinolytic mitochondrial matrix peptidase chaperone subunit X       |
| CLTC     | ENSG00000141367 | clathrin heavy chain                                                  |
| CLU      | ENSG00000120885 | clusterin                                                             |
| CLYBL    | ENSG00000125246 | citramalyl-CoA lyase                                                  |
| CMC4     | ENSG00000182712 | C-X9-C motif containing 4                                             |
| COA4     | ENSG00000181924 | cytochrome c oxidase assembly factor 4 homolog                        |
| COA7     | ENSG00000162377 | cytochrome c oxidase assembly factor 7                                |
| COASY    | ENSG00000068120 | Coenzyme A synthase                                                   |
| COL4A3BP | ENSG00000113163 | ceramide transporter 1                                                |
| COMT     | ENSG00000093010 | catechol-O-methyltransferase                                          |
| COMTD1   | ENSG00000165644 | catechol-O-methyltransferase domain containing 1                      |
| COQ10A   | ENSG00000135469 | coenzyme Q10A                                                         |
| COQ10B   | ENSG00000115520 | coenzyme Q10B                                                         |
| COQ2     | ENSG00000173085 | coenzyme Q2 polyprenyltransferase                                     |
| COQ3     | ENSG00000132423 | coenzyme Q3 methyltransferase                                         |
| COQ4     | ENSG00000167113 | coenzyme Q4                                                           |
| COQ5     | ENSG00000110871 | coenzyme Q5 methyltransferase                                         |
| COQ6     | ENSG00000119723 | coenzyme Q6 monooxygenase                                             |
| COQ7     | ENSG00000167186 | coenzyme Q7 hydroxylase                                               |
| COQ9     | ENSG00000088682 | coenzyme Q9                                                           |
| COX10    | ENSG0000006695  | cytochrome c oxidase assembly factor heme A:farnesyltransferase COX10 |
| COX14    | ENSG00000178449 | cytochrome c oxidase assembly factor COX14                            |
| COX15    | ENSG00000014919 | cytochrome c oxidase assembly homolog COX15                           |
| COX16    | ENSG00000133983 | cytochrome c oxidase assembly factor COX16                            |
| COX17    | ENSG00000138495 | cytochrome c oxidase copper chaperone COX17                           |
| COX18    | ENSG00000163626 | cytochrome c oxidase assembly factor COX18                            |
| COX19    | ENSG00000240230 | cytochrome c oxidase assembly factor COX19                            |
| COX20    | ENSG00000203667 | cytochrome c oxidase assembly factor COX20                            |
| COX4I1   | ENSG00000131143 | cytochrome c oxidase subunit 4I1                                      |
| COX4I2   | ENSG00000131055 | cytochrome c oxidase subunit 4I2                                      |
| COX5A    | ENSG00000178741 | cytochrome c oxidase subunit 5A                                       |
| COX5B    | ENSG00000135940 | cytochrome c oxidase subunit 5B                                       |
| COX6A1   | ENSG00000111775 | cytochrome c oxidase subunit 6A1                                      |
| COX6A2   | ENSG00000156885 | cytochrome c oxidase subunit 6A2                                      |
| COX6B1   | ENSG00000126267 | cytochrome c oxidase subunit 6B1                                      |
| COX6B2   | ENSG00000160471 | cytochrome c oxidase subunit 6B2                                      |
| COX6C    | ENSG00000164919 | cytochrome c oxidase subunit 6C                                       |
| COX7A1   | ENSG00000161281 | cytochrome c oxidase subunit 7A1                                      |
| COX7A2   | ENSG00000112695 | cytochrome c oxidase subunit 7A2                                      |
| COX7A2L  | ENSG00000115944 | cytochrome c oxidase subunit 7A2 like                                 |
| COX7B    | ENSG00000131174 | cytochrome c oxidase subunit 7B                                       |
| COX7C    | ENSG00000127184 | cytochrome c oxidase subunit 7C                                       |
| COX8A    | ENSG00000176340 | cytochrome c oxidase subunit 8A                                       |
| COX8C    | ENSG00000187581 | cytochrome c oxidase subunit 8C                                       |
| CPOX     | ENSG00000080819 | coproporphyrinogen oxidase                                            |
| CPS1     | ENSG00000021826 | carbamoyl-phosphate synthase 1                                        |
| CPT1A    | ENSG00000110090 | carnitine palmitoyltransferase 1A                                     |
| CPT1B    | ENSG00000205560 | carnitine palmitoyltransferase 1B                                     |
| CPT1C    | ENSG00000169169 | carnitine palmitoyltransferase 1C                                     |
| CPT2     | ENSG00000157184 | carnitine palmitoyltransferase 2                                      |
| CRAT     | ENSG00000095321 | carnitine O-acetyltransferase                                         |

|         |                 |                                                     |
|---------|-----------------|-----------------------------------------------------|
| CRLS1   | ENSG00000088766 | cardiolipin synthase 1                              |
| CROT    | ENSG00000005469 | carnitine O-octanoyltransferase                     |
| CRY1    | ENSG00000008405 | cryptochrome circadian regulator 1                  |
| CRY2    | ENSG00000121671 | cryptochrome circadian regulator 2                  |
| CRYAB   | ENSG00000109846 | crystallin alpha B                                  |
| CRYM    | ENSG00000103316 | crystallin mu                                       |
| CRYZ    | ENSG00000116791 | crystallin zeta                                     |
| CS      | ENSG00000062485 | citrate synthase                                    |
| CTPS2   | ENSG00000047230 | CTP synthase 2                                      |
| CTSA    | ENSG00000064601 | cathepsin A                                         |
| CTSB    | ENSG00000164733 | cathepsin B                                         |
| CTSD    | ENSG00000117984 | cathepsin D                                         |
| CTU1    | ENSG00000142544 | cytosolic thiouridylase subunit 1                   |
| CYB5A   | ENSG00000166347 | cytochrome b5 type A                                |
| CYB5B   | ENSG00000103018 | cytochrome b5 type B                                |
| CYB5R1  | ENSG00000159348 | cytochrome b5 reductase 1                           |
| CYB5R2  | ENSG00000166394 | cytochrome b5 reductase 2                           |
| CYB5R3  | ENSG00000100243 | cytochrome b5 reductase 3                           |
| CYBA    | ENSG00000051523 | cytochrome b-245 alpha chain                        |
| CYBB    | ENSG00000165168 | cytochrome b-245 beta chain                         |
| CYC1    | ENSG00000179091 | cytochrome c1                                       |
| CYCS    | ENSG00000172115 | cytochrome c somatic                                |
| CYP11A1 | ENSG00000140459 | cytochrome P450 family 11 subfamily A member 1      |
| CYP11B1 | ENSG00000160882 | cytochrome P450 family 11 subfamily B member 1      |
| CYP11B2 | ENSG00000179142 | cytochrome P450 family 11 subfamily B member 2      |
| CYP17A1 | ENSG00000148795 | cytochrome P450 family 17 subfamily A member 1      |
| CYP1A1  | ENSG00000140465 | cytochrome P450 family 1 subfamily A member 1       |
| CYP1B1  | ENSG00000138061 | cytochrome P450 family 1 subfamily B member 1       |
| CYP24A1 | ENSG00000019186 | cytochrome P450 family 24 subfamily A member 1      |
| CYP27A1 | ENSG00000135929 | cytochrome P450 family 27 subfamily A member 1      |
| CYP27B1 | ENSG00000111012 | cytochrome P450 family 27 subfamily B member 1      |
| CYP2D6  | ENSG00000100197 | cytochrome P450 family 2 subfamily D member 6       |
| CYP2E1  | ENSG00000130649 | cytochrome P450 family 2 subfamily E member 1       |
| D2HGDH  | ENSG00000180902 | D-2-hydroxyglutarate dehydrogenase                  |
| DACT2   | ENSG00000164488 | dishevelled binding antagonist of beta catenin 2    |
| DAOA    | ENSG00000182346 | D-amino acid oxidase activator                      |
| DAP3    | ENSG00000132676 | death associated protein 3                          |
| DARS2   | ENSG00000117593 | aspartyl-tRNA synthetase 2 mitochondrial            |
| DBI     | ENSG00000155368 | diazepam binding inhibitor acyl-CoA binding protein |
| DBT     | ENSG00000137992 | dihydrolipoamide branched chain transacylase E2     |
| DCAF5   | ENSG00000139990 | DDB1 and CUL4 associated factor 5                   |
| DCAKD   | ENSG00000172992 | dephospho-CoA kinase domain containing              |
| DCPS    | ENSG00000110063 | decapping enzyme scavenger                          |
| DCXR    | ENSG00000169738 | dicarbonyl and L-xylulose reductase                 |
| DDAH1   | ENSG00000153904 | dimethylarginine dimethylaminohydrolase 1           |
| DDAH2   | ENSG00000213722 | dimethylarginine dimethylaminohydrolase 2           |
| DDHD2   | ENSG00000085788 | DDHD domain containing 2                            |
| DDIT4   | ENSG00000168209 | DNA damage inducible transcript 4                   |
| DDX23   | ENSG00000174243 | DEAD-box helicase 23                                |
| DDX28   | ENSG00000182810 | DEAD-box helicase 28                                |
| DECR1   | ENSG00000104325 | 2 4-dienoyl-CoA reductase 1                         |
| DEPP1   | ENSG00000165507 | DEPP autophagy regulator 1                          |



|         |                 |                                                           |
|---------|-----------------|-----------------------------------------------------------|
| DGAT2   | ENSG00000062282 | diacylglycerol O-acyltransferase 2                        |
| DGUOK   | ENSG00000114956 | deoxyguanosine kinase                                     |
| DHCR24  | ENSG00000116133 | 24-dehydrocholesterol reductase                           |
| DHFRL1  | ENSG00000178700 | dihydrofolate reductase 2                                 |
| DHODH   | ENSG00000102967 | dihydroorotate dehydrogenase (quinone)                    |
| DHRS1   | ENSG00000157379 | dehydrogenase/reductase 1                                 |
| DHRS2   | ENSG00000100867 | dehydrogenase/reductase 2                                 |
| DHRS4   | ENSG00000157326 | dehydrogenase/reductase 4                                 |
| DHRS7B  | ENSG00000109016 | dehydrogenase/reductase 7B                                |
| DHRSX   | ENSG00000169084 | dehydrogenase/reductase X-linked                          |
| DHTKD1  | ENSG00000181192 | dehydrogenase E1 and transketolase domain containing 1    |
| DHX29   | ENSG00000067248 | DExH-box helicase 29                                      |
| DHX30   | ENSG00000132153 | DExH-box helicase 30                                      |
| DHX32   | ENSG00000089876 | DEAH-box helicase 32 (putative)                           |
| DIABLO  | ENSG00000184047 | diablo IAP-binding mitochondrial protein                  |
| DISC1   | ENSG00000162946 | DISC1 scaffold protein                                    |
| DLAT    | ENSG00000150768 | dihydrolipoamide S-acetyltransferase                      |
| DLD     | ENSG00000091140 | dihydrolipoamide dehydrogenase                            |
| DLST    | ENSG00000119689 | dihydrolipoamide S-succinyltransferase                    |
| DMGDH   | ENSG00000132837 | dimethylglycine dehydrogenase                             |
| DMPK    | ENSG00000104936 | DM1 protein kinase                                        |
| DNA2    | ENSG00000138346 | DNA replication helicase/nuclease 2                       |
| DNAJA1  | ENSG00000086061 | DnaJ heat shock protein family (Hsp40) member A1          |
| DNAJA3  | ENSG00000103423 | DnaJ heat shock protein family (Hsp40) member A3          |
| DNAJC11 | ENSG00000007923 | DnaJ heat shock protein family (Hsp40) member C11         |
| DNAJC15 | ENSG00000120675 | DnaJ heat shock protein family (Hsp40) member C15         |
| DNAJC19 | ENSG00000205981 | DnaJ heat shock protein family (Hsp40) member C19         |
| DNAJC27 | ENSG00000115137 | DnaJ heat shock protein family (Hsp40) member C27         |
| DNAJC28 | ENSG00000177692 | DnaJ heat shock protein family (Hsp40) member C28         |
| DNAJC30 | ENSG00000176410 | DnaJ heat shock protein family (Hsp40) member C30         |
| DNAJC4  | ENSG00000110011 | DnaJ heat shock protein family (Hsp40) member C4          |
| DNAJC5  | ENSG00000101152 | DnaJ heat shock protein family (Hsp40) member C5          |
| DNLZ    | ENSG00000213221 | DNL-type zinc finger                                      |
| DNM1L   | ENSG00000087470 | dynamitin 1 like                                          |
| DNM3    | ENSG00000197959 | dynamitin 3                                               |
| DPYSL2  | ENSG00000092964 | dihydropyrimidinase like 2                                |
| DRG2    | ENSG00000108591 | developmentally regulated GTP binding protein 2           |
| DSP     | ENSG00000096696 | desmoplakin                                               |
| DUS2    | ENSG00000167264 | dihydrouridine synthase 2                                 |
| DUSP26  | ENSG00000133878 | dual specificity phosphatase 26                           |
| DUT     | ENSG00000128951 | deoxyuridine triphosphatase                               |
| E9PI62  | ENSG00000254536 |                                                           |
| EARS2   | ENSG00000103356 | glutamyl-tRNA synthetase 2 mitochondrial                  |
| ECH1    | ENSG00000104823 | enoyl-CoA hydratase 1                                     |
| ECHDC1  | ENSG00000093144 | ethylmalonyl-CoA decarboxylase 1                          |
| ECHDC2  | ENSG00000121310 | enoyl-CoA hydratase domain containing 2                   |
| ECHDC3  | ENSG00000134463 | enoyl-CoA hydratase domain containing 3                   |
| ECHS1   | ENSG00000127884 | enoyl-CoA hydratase short chain 1                         |
| ECI1    | ENSG00000167969 | enoyl-CoA delta isomerase 1                               |
| ECI2    | ENSG00000198721 | enoyl-CoA delta isomerase 2                               |
| ECSIT   | ENSG00000130159 | ECSIT signaling integrator                                |
| EEFSEC  | ENSG00000132394 | eukaryotic elongation factor selenocysteine-tRNA specific |

|         |                 |                                                         |
|---------|-----------------|---------------------------------------------------------|
| EFHD1   | ENSG00000115468 | EF-hand domain family member D1                         |
| EHHADH  | ENSG00000113790 | enoyl-CoA hydratase and 3-hydroxyacyl CoA dehydrogenase |
| ELAC2   | ENSG00000006744 | elaC ribonuclease Z 2                                   |
| ELK3    | ENSG00000111145 | ETS transcription factor ELK3                           |
| EMC8    | ENSG00000131148 | ER membrane protein complex subunit 8                   |
| ENDOG   | ENSG00000167136 | endonuclease G                                          |
| ENOSF1  | ENSG00000132199 | enolase superfamily member 1                            |
| EPHX2   | ENSG00000120915 | epoxide hydrolase 2                                     |
| ERAL1   | ENSG00000132591 | Era like 12S mitochondrial rRNA chaperone 1             |
| ERCC6L2 | ENSG00000182150 | ERCC excision repair 6 like 2                           |
| ERN1    | ENSG00000178607 | endoplasmic reticulum to nucleus signaling 1            |
| ESR2    | ENSG00000140009 | estrogen receptor 2                                     |
| ETFA    | ENSG00000140374 | electron transfer flavoprotein subunit alpha            |
| ETFB    | ENSG00000105379 | electron transfer flavoprotein subunit beta             |
| ETFDH   | ENSG00000171503 | electron transfer flavoprotein dehydrogenase            |
| ETNPPL  | ENSG00000164089 | ethanolamine-phosphate phospho-lyase                    |
| EXOG    | ENSG00000157036 | exo/endonuclease G                                      |
| F5H5T6  | ENSG00000256591 |                                                         |
| FABP1   | ENSG00000163586 | fatty acid binding protein 1                            |
| FADS1   | ENSG00000149485 | fatty acid desaturase 1                                 |
| FAHD1   | ENSG00000180185 | fumarylacetoacetate hydrolase domain containing 1       |
| FAHD2A  | ENSG00000115042 | fumarylacetoacetate hydrolase domain containing 2A      |
| FAM136A | ENSG00000035141 | family with sequence similarity 136 member A            |
| FAM162A | ENSG00000114023 | family with sequence similarity 162 member A            |
| FAM185A | ENSG00000222011 | family with sequence similarity 185 member A            |
| FAM213A | ENSG00000122378 | peroxiredoxin like 2A                                   |
| FAM32A  | ENSG00000105058 | family with sequence similarity 32 member A             |
| FAM65B  | ENSG00000111913 | RHO family interacting cell polarization regulator 2    |
| FAM72A  | ENSG00000196550 | family with sequence similarity 72 member A             |
| FANCG   | ENSG00000221829 | FA complementation group G                              |
| FARS2   | ENSG00000145982 | phenylalanyl-tRNA synthetase 2 mitochondrial            |
| FASN    | ENSG00000169710 | fatty acid synthase                                     |
| FASTK   | ENSG00000164896 | Fas activated serine/threonine kinase                   |
| FASTKD1 | ENSG00000138399 | FAST kinase domains 1                                   |
| FASTKD2 | ENSG00000118246 | FAST kinase domains 2                                   |
| FASTKD3 | ENSG00000124279 | FAST kinase domains 3                                   |
| FASTKD5 | ENSG00000215251 | FAST kinase domains 5                                   |
| FBXL4   | ENSG00000112234 | F-box and leucine rich repeat protein 4                 |
| FBXO7   | ENSG00000100225 | F-box protein 7                                         |
| FDPS    | ENSG00000160752 | farnesyl diphosphate synthase                           |
| FDX1    | ENSG00000137714 | ferredoxin 1                                            |
| FDX1L   | ENSG00000267673 | ferredoxin 2                                            |
| FDXR    | ENSG00000161513 | ferredoxin reductase                                    |
| FECH    | ENSG00000066926 | ferrochelatase                                          |
| FEN1    | ENSG00000168496 | flap structure-specific endonuclease 1                  |
| FH      | ENSG00000091483 | fumarate hydratase                                      |
| FHIT    | ENSG00000189283 | fragile histidine triad diadenosine triphosphatase      |
| FIBP    | ENSG00000172500 | FGF1 intracellular binding protein                      |
| FIS1    | ENSG00000214253 | fission mitochondrial 1                                 |
| FITM2   | ENSG00000197296 | fat storage inducing transmembrane protein 2            |
| FKBP10  | ENSG00000141756 | FKBP prolyl isomerase 10                                |
| FKBP4   | ENSG00000004478 | FKBP prolyl isomerase 4                                 |

|            |                 |                                                                  |
|------------|-----------------|------------------------------------------------------------------|
| FKBP8      | ENSG00000105701 | FKBP prolyl isomerase 8                                          |
| FLAD1      | ENSG00000160688 | flavin adenine dinucleotide synthetase 1                         |
| FLVCR1     | ENSG00000162769 | FLVCR heme transporter 1                                         |
| FOXO1      | ENSG00000150907 | forkhead box O1                                                  |
| FOXRED1    | ENSG00000110074 | FAD dependent oxidoreductase domain containing 1                 |
| FPGS       | ENSG00000136877 | folylpolyglutamate synthase                                      |
| FSIP2      | ENSG00000188738 | fibrous sheath interacting protein 2                             |
| FTH1       | ENSG00000167996 | ferritin heavy chain 1                                           |
| FTMT       | ENSG00000181867 | ferritin mitochondrial                                           |
| FTSJ2      | ENSG00000122687 | mitochondrial rRNA methyltransferase 2                           |
| FUNDC1     | ENSG00000069509 | FUN14 domain containing 1                                        |
| FUNDC2     | ENSG00000165775 | FUN14 domain containing 2                                        |
| FXN        | ENSG00000165060 | frataxin                                                         |
| FYN        | ENSG00000010810 | FYN proto-oncogene Src family tyrosine kinase                    |
| G0S2       | ENSG00000123689 | G0/G1 switch 2                                                   |
| GADD45GIP1 | ENSG00000179271 | GADD45G interacting protein 1                                    |
| GAPDH      | ENSG00000111640 | glyceraldehyde-3-phosphate dehydrogenase                         |
| GARS       | ENSG00000106105 | glycyl-tRNA synthetase 1                                         |
| GATC       | ENSG00000257218 | glutamyl-tRNA amidotransferase subunit C                         |
| GATM       | ENSG00000171766 | glycine amidinotransferase                                       |
| GBAS       | ENSG00000146729 | nipsnap homolog 2                                                |
| GBF1       | ENSG00000107862 | golgi brefeldin A resistant guanine nucleotide exchange factor 1 |
| GCAT       | ENSG00000100116 | glycine C-acetyltransferase                                      |
| GCDH       | ENSG00000105607 | glutaryl-CoA dehydrogenase                                       |
| GCK        | ENSG00000106633 | glucokinase                                                      |
| GCKR       | ENSG00000084734 | glucokinase regulator                                            |
| GCSH       | ENSG00000140905 | glycine cleavage system protein H                                |
| GDF5OS     | ENSG00000204183 | GDF5 antisense RNA 1                                             |
| GFER       | ENSG00000127554 | growth factor augmentor of liver regeneration                    |
| GFM1       | ENSG00000168827 | G elongation factor mitochondrial 1                              |
| GFM2       | ENSG00000164347 | GTP dependent ribosome recycling factor mitochondrial 2          |
| GHITM      | ENSG00000165678 | growth hormone inducible transmembrane protein                   |
| GHR        | ENSG00000112964 | growth hormone receptor                                          |
| GIMAP8     | ENSG00000171115 | GTPase IMAP family member 8                                      |
| GIT1       | ENSG00000108262 | GIT ArfGAP 1                                                     |
| GK         | ENSG00000198814 | glycerol kinase                                                  |
| GLDC       | ENSG00000178445 | glycine decarboxylase                                            |
| GLOD4      | ENSG00000167699 | glyoxalase domain containing 4                                   |
| GLRX       | ENSG00000173221 | glutaredoxin                                                     |
| GLRX2      | ENSG00000023572 | glutaredoxin 2                                                   |
| GLRX5      | ENSG00000182512 | glutaredoxin 5                                                   |
| GLS        | ENSG00000115419 | glutaminase                                                      |
| GLS2       | ENSG00000135423 | glutaminase 2                                                    |
| GLUD1      | ENSG00000148672 | glutamate dehydrogenase 1                                        |
| GLUD2      | ENSG00000182890 | glutamate dehydrogenase 2                                        |
| GLUL       | ENSG00000135821 | glutamate-ammonia ligase                                         |
| GLYAT      | ENSG00000149124 | glycine-N-acyltransferase                                        |
| GLYATL1    | ENSG00000166840 | glycine-N-acyltransferase like 1                                 |
| GLYATL2    | ENSG00000156689 | glycine-N-acyltransferase like 2                                 |
| GLYATL3    | ENSG00000203972 | glycine-N-acyltransferase like 3                                 |
| GLYCTK     | ENSG00000168237 | glycerate kinase                                                 |
| GM2A       | ENSG00000196743 | ganglioside GM2 activator                                        |

|         |                 |                                                                               |
|---------|-----------------|-------------------------------------------------------------------------------|
| GML     | ENSG00000104499 | glycosylphosphatidylinositol anchored molecule like                           |
| GMPPB   | ENSG00000173540 | GDP-mannose pyrophosphorylase B                                               |
| GNB2L1  | ENSG00000204628 | receptor for activated C kinase 1                                             |
| GNG5    | ENSG00000174021 | G protein subunit gamma 5                                                     |
| GNL3L   | ENSG00000130119 | G protein nucleolar 3 like                                                    |
| GNPAT   | ENSG00000116906 | glyceronephosphate O-acyltransferase                                          |
| GOLPH3  | ENSG00000113384 | golgi phosphoprotein 3                                                        |
| GOT2    | ENSG00000125166 | glutamic-oxaloacetic transaminase 2                                           |
| GPAM    | ENSG00000119927 | glycerol-3-phosphate acyltransferase mitochondrial                            |
| GPAT2   | ENSG00000186281 | glycerol-3-phosphate acyltransferase 2 mitochondrial                          |
| GPD1    | ENSG00000167588 | glycerol-3-phosphate dehydrogenase 1                                          |
| GPD2    | ENSG00000115159 | glycerol-3-phosphate dehydrogenase 2                                          |
| GPI     | ENSG00000105220 | glucose-6-phosphate isomerase                                                 |
| GPRC5C  | ENSG00000170412 | G protein-coupled receptor class C group 5 member C                           |
| GPT2    | ENSG00000166123 | glutamic--pyruvic transaminase 2                                              |
| GPX1    | ENSG00000233276 | glutathione peroxidase 1                                                      |
| GPX4    | ENSG00000167468 | glutathione peroxidase 4                                                      |
| GRAMD4  | ENSG00000075240 | GRAM domain containing 4                                                      |
| GRHPR   | ENSG00000137106 | glyoxylate and hydroxypyruvate reductase                                      |
| GRN     | ENSG00000030582 | granulin precursor                                                            |
| GRPEL1  | ENSG00000109519 | GrpE like 1 mitochondrial                                                     |
| GRSF1   | ENSG00000132463 | G-rich RNA sequence binding factor 1                                          |
| GSDMC   | ENSG00000147697 | gasdermin C                                                                   |
| GSR     | ENSG00000104687 | glutathione-disulfide reductase                                               |
| GSTK1   | ENSG00000197448 | glutathione S-transferase kappa 1                                             |
| GSTO1   | ENSG00000148834 | glutathione S-transferase omega 1                                             |
| GSTP1   | ENSG00000084207 | glutathione S-transferase pi 1                                                |
| GSTZ1   | ENSG00000100577 | glutathione S-transferase zeta 1                                              |
| GTPBP10 | ENSG00000105793 | GTP binding protein 10                                                        |
| GTPBP3  | ENSG00000130299 | GTP binding protein 3 mitochondrial                                           |
| GTPBP6  | ENSG00000178605 | GTP binding protein 6 (putative)                                              |
| GTPBP8  | ENSG00000163607 | GTP binding protein 8 (putative)                                              |
| GUF1    | ENSG00000151806 | GTP binding elongation factor GUF1                                            |
| GUK1    | ENSG00000143774 | guanylate kinase 1                                                            |
| H6PD    | ENSG00000049239 | hexose-6-phosphate dehydrogenase/glucose 1-dehydrogenase                      |
| HADH    | ENSG00000138796 | hydroxyacyl-CoA dehydrogenase                                                 |
| HADHA   | ENSG00000084754 | hydroxyacyl-CoA dehydrogenase trifunctional multienzyme complex subunit alpha |
| HADHB   | ENSG00000138029 | hydroxyacyl-CoA dehydrogenase trifunctional multienzyme complex subunit beta  |
| HAGH    | ENSG00000063854 | hydroxyacylglutathione hydrolase                                              |
| HAO2    | ENSG00000116882 | hydroxyacid oxidase 2                                                         |
| HAP1    | ENSG00000173805 | huntingtin associated protein 1                                               |
| HARS2   | ENSG00000112855 | histidyl-tRNA synthetase 2 mitochondrial                                      |
| HAX1    | ENSG00000143575 | HCLS1 associated protein X-1                                                  |
| HCCS    | ENSG00000004961 | holocytochrome c synthase                                                     |
| HCFC1   | ENSG00000172534 | host cell factor C1                                                           |
| HCLS1   | ENSG00000180353 | hematopoietic cell-specific Lyn substrate 1                                   |
| HDDC2   | ENSG00000111906 | HD domain containing 2                                                        |
| HDHD3   | ENSG00000119431 | haloacid dehalogenase like hydrolase domain containing 3                      |
| HEATR1  | ENSG00000119285 | HEAT repeat containing 1                                                      |
| HEBP1   | ENSG00000013583 | heme binding protein 1                                                        |

|          |                 |                                                                 |
|----------|-----------------|-----------------------------------------------------------------|
| HEBP2    | ENSG00000051620 | heme binding protein 2                                          |
| HEMK1    | ENSG00000114735 | HemK methyltransferase family member 1                          |
| HIBADH   | ENSG00000106049 | 3-hydroxyisobutyrate dehydrogenase                              |
| HIBCH    | ENSG00000198130 | 3-hydroxyisobutyryl-CoA hydrolase                               |
| HIGD1A   | ENSG00000181061 | HIG1 hypoxia inducible domain family member 1A                  |
| HIGD2A   | ENSG00000146066 | HIG1 hypoxia inducible domain family member 2A                  |
| HINT1    | ENSG00000169567 | histidine triad nucleotide binding protein 1                    |
| HINT2    | ENSG00000137133 | histidine triad nucleotide binding protein 2                    |
| HINT3    | ENSG00000111911 | histidine triad nucleotide binding protein 3                    |
| HIVEP1   | ENSG00000095951 | HIVEP zinc finger 1                                             |
| HK1      | ENSG00000156515 | hexokinase 1                                                    |
| HK2      | ENSG00000159399 | hexokinase 2                                                    |
| HK3      | ENSG00000160883 | hexokinase 3                                                    |
| HLCS     | ENSG00000159267 | holocarboxylase synthetase                                      |
| HMBS     | ENSG00000256269 | hydroxymethylbilane synthase                                    |
| HMGCL    | ENSG00000117305 | 3-hydroxy-3-methylglutaryl-CoA lyase                            |
| HMGCS2   | ENSG00000134240 | 3-hydroxy-3-methylglutaryl-CoA synthase 2                       |
| HOGA1    | ENSG00000241935 | 4-hydroxy-2-oxoglutarate aldolase 1                             |
| HOXB9    | ENSG00000170689 | homeobox B9                                                     |
| HRK      | ENSG00000135116 | harakiri BCL2 interacting protein                               |
| HRSP12   | ENSG00000132541 | reactive intermediate imine deaminase A homolog                 |
| HSCB     | ENSG00000100209 | HscB mitochondrial iron-sulfur cluster cochaperone              |
| HSD17B10 | ENSG00000072506 | hydroxysteroid 17-beta dehydrogenase 10                         |
| HSD17B4  | ENSG00000133835 | hydroxysteroid 17-beta dehydrogenase 4                          |
| HSD17B8  | ENSG00000204228 | hydroxysteroid 17-beta dehydrogenase 8                          |
| HSDL1    | ENSG00000103160 | hydroxysteroid dehydrogenase like 1                             |
| HSDL2    | ENSG00000119471 | hydroxysteroid dehydrogenase like 2                             |
| HSH2D    | ENSG00000196684 | hematopoietic SH2 domain containing                             |
| HSP90AA1 | ENSG00000080824 | heat shock protein 90 alpha family class A member 1             |
| HSP90AB1 | ENSG00000096384 | heat shock protein 90 alpha family class B member 1             |
| HSPA1A   | ENSG00000204389 | heat shock protein family A (Hsp70) member 1A                   |
| HSPA2    | ENSG00000126803 | heat shock protein family A (Hsp70) member 2                    |
| HSPA4    | ENSG00000170606 | heat shock protein family A (Hsp70) member 4                    |
| HSPA9    | ENSG00000113013 | heat shock protein family A (Hsp70) member 9                    |
| HSPB7    | ENSG00000173641 | heat shock protein family B (small) member 7                    |
| HSPD1    | ENSG00000144381 | heat shock protein family D (Hsp60) member 1                    |
| HSPE1    | ENSG00000115541 | heat shock protein family E (Hsp10) member 1                    |
| HTATIP2  | ENSG00000109854 | HIV-1 Tat interactive protein 2                                 |
| HTRA2    | ENSG00000115317 | HtrA serine peptidase 2                                         |
| HTT      | ENSG00000197386 | huntingtin                                                      |
| IARS2    | ENSG00000067704 | isoleucyl-tRNA synthetase 2 mitochondrial                       |
| IBA57    | ENSG00000181873 | iron-sulfur cluster assembly factor IBA57                       |
| ICT1     | ENSG00000167862 | mitochondrial ribosomal protein L58                             |
| IDE      | ENSG00000119912 | insulin degrading enzyme                                        |
| IDH1     | ENSG00000138413 | isocitrate dehydrogenase (NADP(+)) 1                            |
| IDH2     | ENSG00000182054 | isocitrate dehydrogenase (NADP(+)) 2                            |
| IDH3A    | ENSG00000166411 | isocitrate dehydrogenase (NAD(+)) 3 catalytic subunit alpha     |
| IDH3B    | ENSG00000101365 | isocitrate dehydrogenase (NAD(+)) 3 non-catalytic subunit beta  |
| IDH3G    | ENSG00000067829 | isocitrate dehydrogenase (NAD(+)) 3 non-catalytic subunit gamma |
| IDI1     | ENSG00000067064 | isopentenyl-diphosphate delta isomerase 1                       |
| IFI27    | ENSG00000165949 | interferon alpha inducible protein 27                           |
| IFI6     | ENSG00000126709 | interferon alpha inducible protein 6                            |

|          |                 |                                                               |
|----------|-----------------|---------------------------------------------------------------|
| IFIT3    | ENSG00000119917 | interferon induced protein with tetratricopeptide repeats 3   |
| ILF3     | ENSG00000129351 | interleukin enhancer binding factor 3                         |
| IMMP1L   | ENSG00000148950 | inner mitochondrial membrane peptidase subunit 1              |
| IMMP2L   | ENSG00000184903 | inner mitochondrial membrane peptidase subunit 2              |
| IMMT     | ENSG00000132305 | inner membrane mitochondrial protein                          |
| IQCE     | ENSG00000106012 | IQ motif containing E                                         |
| IREB2    | ENSG00000136381 | iron responsive element binding protein 2                     |
| ISCA1    | ENSG00000135070 | iron-sulfur cluster assembly 1                                |
| ISCA2    | ENSG00000165898 | iron-sulfur cluster assembly 2                                |
| ISCU     | ENSG00000136003 | iron-sulfur cluster assembly enzyme                           |
| ISOC2    | ENSG00000063241 | isochorismatase domain containing 2                           |
| IVD      | ENSG00000128928 | isovaleryl-CoA dehydrogenase                                  |
| JTB      | ENSG00000143543 | jumping translocation breakpoint                              |
| KANK2    | ENSG00000197256 | KN motif and ankyrin repeat domains 2                         |
| KARS     | ENSG00000065427 | lysyl-tRNA synthetase 1                                       |
| KCNJ11   | ENSG00000187486 | potassium inwardly rectifying channel subfamily J member 11   |
| KCNJ8    | ENSG00000121361 | potassium inwardly rectifying channel subfamily J member 8    |
| KIAA0100 | ENSG00000007202 | bridge-like lipid transfer protein family member 2            |
| KIAA0141 | ENSG00000081791 | DAP3 binding cell death enhancer 1                            |
| KIAA0391 | ENSG00000100890 | protein only RNase P catalytic subunit                        |
| KIAA1279 | ENSG00000198954 | kinesin family binding protein                                |
| KIAA1683 | ENSG00000130518 | IQ motif containing N                                         |
| KIF1B    | ENSG00000054523 | kinesin family member 1B                                      |
| KLK6     | ENSG00000167755 | kallikrein related peptidase 6                                |
| KMO      | ENSG00000117009 | kynurenine 3-monooxygenase                                    |
| KRAS     | ENSG00000133703 | KRAS proto-oncogene GTPase                                    |
| KRT5     | ENSG00000186081 | keratin 5                                                     |
| KYNU     | ENSG00000115919 | kynureninase                                                  |
| L2HGDH   | ENSG00000087299 | L-2-hydroxyglutarate dehydrogenase                            |
| LACE1    | ENSG00000135537 | AFG1 like ATPase                                              |
| LACTB    | ENSG00000103642 | lactamase beta                                                |
| LACTB2   | ENSG00000147592 | lactamase beta 2                                              |
| LAMC1    | ENSG00000135862 | laminin subunit gamma 1                                       |
| LAP3     | ENSG00000002549 | leucine aminopeptidase 3                                      |
| LARS2    | ENSG00000011376 | leucyl-tRNA synthetase 2 mitochondrial                        |
| LBR      | ENSG00000143815 | lamin B receptor                                              |
| LDHA     | ENSG00000134333 | lactate dehydrogenase A                                       |
| LDHAL6B  | ENSG00000171989 | lactate dehydrogenase A like 6B                               |
| LDHB     | ENSG00000111716 | lactate dehydrogenase B                                       |
| LDHD     | ENSG00000166816 | lactate dehydrogenase D                                       |
| LEPR     | ENSG00000116678 | leptin receptor                                               |
| LETM1    | ENSG00000168924 | leucine zipper and EF-hand containing transmembrane protein 1 |
| LETM2    | ENSG00000165046 | leucine zipper and EF-hand containing transmembrane protein 2 |
| LETMD1   | ENSG00000050426 | LETM1 domain containing 1                                     |
| LIAS     | ENSG00000121897 | lipoic acid synthetase                                        |
| LIG1     | ENSG00000105486 | DNA ligase 1                                                  |
| LIG3     | ENSG00000005156 | DNA ligase 3                                                  |
| LIPF     | ENSG00000182333 | lipase F gastric type                                         |
| LIPT1    | ENSG00000144182 | lipoyltransferase 1                                           |
| LIPT2    | ENSG00000175536 | lipoyl(octanoyl) transferase 2                                |
| LONP1    | ENSG00000196365 | lon peptidase 1 mitochondrial                                 |
| LONP2    | ENSG00000102910 | lon peptidase 2 peroxisomal                                   |

|            |                 |                                                          |
|------------|-----------------|----------------------------------------------------------|
| LRP5       | ENSG00000162337 | LDL receptor related protein 5                           |
| LRPPRC     | ENSG00000138095 | leucine rich pentatricopeptide repeat containing         |
| LRR75A-AS1 | ENSG00000175061 | small nucleolar RNA host gene 29                         |
| LRRK1      | ENSG00000154237 | leucine rich repeat kinase 1                             |
| LRRK2      | ENSG00000188906 | leucine rich repeat kinase 2                             |
| LYPLA1     | ENSG00000120992 | lysophospholipase 1                                      |
| LYPLAL1    | ENSG00000143353 | lysophospholipase like 1                                 |
| LYRM1      | ENSG00000102897 | LYR motif containing 1                                   |
| LYRM2      | ENSG00000083099 | LYR motif containing 2                                   |
| LYRM4      | ENSG00000214113 | LYR motif containing 4                                   |
| LYRM5      | ENSG00000205707 | electron transfer flavoprotein regulatory factor 1       |
| MAATS1     | ENSG00000183833 | cilia and flagella associated protein 91                 |
| MALSU1     | ENSG00000156928 | mitochondrial assembly of ribosomal large subunit 1      |
| MAOA       | ENSG00000189221 | monoamine oxidase A                                      |
| MAOB       | ENSG00000069535 | monoamine oxidase B                                      |
| MAP2K1     | ENSG00000169032 | mitogen-activated protein kinase kinase 1                |
| MAP2K2     | ENSG00000126934 | mitogen-activated protein kinase kinase 2                |
| MAPK1      | ENSG00000100030 | mitogen-activated protein kinase 1                       |
| MAPK10     | ENSG00000109339 | mitogen-activated protein kinase 10                      |
| MAPK12     | ENSG00000188130 | mitogen-activated protein kinase 12                      |
| MAPK14     | ENSG00000112062 | mitogen-activated protein kinase 14                      |
| MAPK3      | ENSG00000102882 | mitogen-activated protein kinase 3                       |
| MAPK8      | ENSG00000107643 | mitogen-activated protein kinase 8                       |
| MAPK8IP1   | ENSG00000121653 | mitogen-activated protein kinase 8 interacting protein 1 |
| MAPK9      | ENSG00000050748 | mitogen-activated protein kinase 9                       |
| MARC1      | ENSG00000186205 | mitochondrial amidoxime reducing component 1             |
| MARC2      | ENSG00000117791 | mitochondrial amidoxime reducing component 2             |
| MARCH5     | ENSG00000198060 | membrane associated ring-CH-type finger 5                |
| MARK2      | ENSG00000072518 | microtubule affinity regulating kinase 2                 |
| MARS       | ENSG00000166986 | methionyl-tRNA synthetase 1                              |
| MAT2B      | ENSG00000038274 | methionine adenosyltransferase 2B                        |
| MAVS       | ENSG00000088888 | mitochondrial antiviral signaling protein                |
| MCAT       | ENSG00000100294 | malonyl-CoA-acyl carrier protein transacylase            |
| MCCC1      | ENSG00000078070 | methylcrotonyl-CoA carboxylase subunit 1                 |
| MCCC2      | ENSG00000131844 | methylcrotonyl-CoA carboxylase subunit 2                 |
| MCCD1      | ENSG00000204511 | mitochondrial coiled-coil domain 1                       |
| MCEE       | ENSG00000124370 | methylmalonyl-CoA epimerase                              |
| MCL1       | ENSG00000143384 | MCL1 apoptosis regulator BCL2 family member              |
| MCUR1      | ENSG00000050393 | mitochondrial calcium uniporter regulator 1              |
| MDH1       | ENSG00000014641 | malate dehydrogenase 1                                   |
| MDH2       | ENSG00000146701 | malate dehydrogenase 2                                   |
| ME1        | ENSG00000065833 | malic enzyme 1                                           |
| ME2        | ENSG00000082212 | malic enzyme 2                                           |
| ME3        | ENSG00000151376 | malic enzyme 3                                           |
| MECR       | ENSG00000116353 | mitochondrial trans-2-enoyl-CoA reductase                |
| MED7       | ENSG00000155868 | mediator complex subunit 7                               |
| METAP1D    | ENSG00000172878 | methionyl aminopeptidase type 1D mitochondrial           |
| METTL12    | ENSG00000214756 | citrate synthase lysine methyltransferase                |
| METTL15    | ENSG00000169519 | methyltransferase like 15                                |
| METTL17    | ENSG00000165792 | methyltransferase like 17                                |
| METTL5     | ENSG00000138382 | methyltransferase 5 N6-adenosine                         |
| METTL8     | ENSG00000123600 | methyltransferase 8 methylcytidine                       |

|             |                 |                                                                     |
|-------------|-----------------|---------------------------------------------------------------------|
| MFF         | ENSG00000168958 | mitochondrial fission factor                                        |
| MFN1        | ENSG00000171109 | mitofusin 1                                                         |
| MGME1       | ENSG00000125871 | mitochondrial genome maintenance exonuclease 1                      |
| MGST1       | ENSG00000008394 | microsomal glutathione S-transferase 1                              |
| MGST3       | ENSG00000143198 | microsomal glutathione S-transferase 3                              |
| MICOS13     | ENSG00000174917 | mitochondrial contact site and cristae organizing system subunit 13 |
| MIEF2       | ENSG00000177427 | mitochondrial elongation factor 2                                   |
| MINOS1-NBL1 | ENSG00000270136 | MICOS10-NBL1 readthrough                                            |
| MIPEP       | ENSG00000027001 | mitochondrial intermediate peptidase                                |
| MLH1        | ENSG00000076242 | mutL homolog 1                                                      |
| MLYCD       | ENSG00000103150 | malonyl-CoA decarboxylase                                           |
| MMAB        | ENSG00000139428 | metabolism of cobalamin associated B                                |
| MMACHC      | ENSG00000132763 | metabolism of cobalamin associated C                                |
| MMADHC      | ENSG00000168288 | metabolism of cobalamin associated D                                |
| MMP2        | ENSG00000087245 | matrix metalloproteinase 2                                          |
| MOAP1       | ENSG00000165943 | modulator of apoptosis 1                                            |
| MOBP        | ENSG00000168314 | myelin associated oligodendrocyte basic protein                     |
| MOCOS1      | ENSG00000124615 | molybdenum cofactor synthesis 1                                     |
| MPC2        | ENSG00000143158 | mitochondrial pyruvate carrier 2                                    |
| MPDU1       | ENSG00000129255 | mannose-P-dolichol utilization defect 1                             |
| MPO         | ENSG00000005381 | myeloperoxidase                                                     |
| MPP7        | ENSG00000150054 | MAGUK p55 scaffold protein 7                                        |
| MPST        | ENSG00000128309 | mercaptopyruvate sulfurtransferase                                  |
| MPV17       | ENSG00000115204 | mitochondrial inner membrane protein MPV17                          |
| MPV17L      | ENSG00000156968 | MPV17 mitochondrial inner membrane protein like                     |
| MPV17L2     | ENSG00000254858 | MPV17 mitochondrial inner membrane protein like 2                   |
| MRM1        | ENSG00000278619 | mitochondrial rRNA methyltransferase 1                              |
| MRPL1       | ENSG00000169288 | mitochondrial ribosomal protein L1                                  |
| MRPL10      | ENSG00000159111 | mitochondrial ribosomal protein L10                                 |
| MRPL11      | ENSG00000174547 | mitochondrial ribosomal protein L11                                 |
| MRPL12      | ENSG00000262814 | mitochondrial ribosomal protein L12                                 |
| MRPL13      | ENSG00000172172 | mitochondrial ribosomal protein L13                                 |
| MRPL14      | ENSG00000180992 | mitochondrial ribosomal protein L14                                 |
| MRPL15      | ENSG00000137547 | mitochondrial ribosomal protein L15                                 |
| MRPL16      | ENSG00000166902 | mitochondrial ribosomal protein L16                                 |
| MRPL17      | ENSG00000158042 | mitochondrial ribosomal protein L17                                 |
| MRPL18      | ENSG00000112110 | mitochondrial ribosomal protein L18                                 |
| MRPL19      | ENSG00000115364 | mitochondrial ribosomal protein L19                                 |
| MRPL2       | ENSG00000112651 | mitochondrial ribosomal protein L2                                  |
| MRPL20      | ENSG00000242485 | mitochondrial ribosomal protein L20                                 |
| MRPL21      | ENSG00000197345 | mitochondrial ribosomal protein L21                                 |
| MRPL22      | ENSG00000082515 | mitochondrial ribosomal protein L22                                 |
| MRPL23      | ENSG00000214026 | mitochondrial ribosomal protein L23                                 |
| MRPL24      | ENSG00000143314 | mitochondrial ribosomal protein L24                                 |
| MRPL27      | ENSG00000108826 | mitochondrial ribosomal protein L27                                 |
| MRPL28      | ENSG00000086504 | mitochondrial ribosomal protein L28                                 |
| MRPL3       | ENSG00000114686 | mitochondrial ribosomal protein L3                                  |
| MRPL30      | ENSG00000185414 | mitochondrial ribosomal protein L30                                 |
| MRPL32      | ENSG00000106591 | mitochondrial ribosomal protein L32                                 |
| MRPL33      | ENSG00000243147 | mitochondrial ribosomal protein L33                                 |
| MRPL34      | ENSG00000130312 | mitochondrial ribosomal protein L34                                 |
| MRPL35      | ENSG00000132313 | mitochondrial ribosomal protein L35                                 |



|         |                 |                                         |
|---------|-----------------|-----------------------------------------|
| MRPL36  | ENSG00000171421 | mitochondrial ribosomal protein L36     |
| MRPL37  | ENSG00000116221 | mitochondrial ribosomal protein L37     |
| MRPL38  | ENSG00000204316 | mitochondrial ribosomal protein L38     |
| MRPL39  | ENSG00000154719 | mitochondrial ribosomal protein L39     |
| MRPL4   | ENSG00000105364 | mitochondrial ribosomal protein L4      |
| MRPL40  | ENSG00000185608 | mitochondrial ribosomal protein L40     |
| MRPL41  | ENSG00000182154 | mitochondrial ribosomal protein L41     |
| MRPL42  | ENSG00000198015 | mitochondrial ribosomal protein L42     |
| MRPL43  | ENSG00000055950 | mitochondrial ribosomal protein L43     |
| MRPL44  | ENSG00000135900 | mitochondrial ribosomal protein L44     |
| MRPL45  | ENSG00000278845 | mitochondrial ribosomal protein L45     |
| MRPL46  | ENSG00000259494 | mitochondrial ribosomal protein L46     |
| MRPL47  | ENSG00000136522 | mitochondrial ribosomal protein L47     |
| MRPL48  | ENSG00000175581 | mitochondrial ribosomal protein L48     |
| MRPL49  | ENSG00000149792 | mitochondrial ribosomal protein L49     |
| MRPL50  | ENSG00000136897 | mitochondrial ribosomal protein L50     |
| MRPL51  | ENSG00000111639 | mitochondrial ribosomal protein L51     |
| MRPL52  | ENSG00000172590 | mitochondrial ribosomal protein L52     |
| MRPL53  | ENSG00000204822 | mitochondrial ribosomal protein L53     |
| MRPL54  | ENSG00000183617 | mitochondrial ribosomal protein L54     |
| MRPL57  | ENSG00000173141 | mitochondrial ribosomal protein L57     |
| MRPL9   | ENSG00000143436 | mitochondrial ribosomal protein L9      |
| MRPS10  | ENSG00000048544 | mitochondrial ribosomal protein S10     |
| MRPS11  | ENSG00000181991 | mitochondrial ribosomal protein S11     |
| MRPS12  | ENSG00000128626 | mitochondrial ribosomal protein S12     |
| MRPS14  | ENSG00000120333 | mitochondrial ribosomal protein S14     |
| MRPS15  | ENSG00000116898 | mitochondrial ribosomal protein S15     |
| MRPS16  | ENSG00000182180 | mitochondrial ribosomal protein S16     |
| MRPS17  | ENSG00000239789 | mitochondrial ribosomal protein S17     |
| MRPS18A | ENSG00000096080 | mitochondrial ribosomal protein S18A    |
| MRPS18B | ENSG00000204568 | mitochondrial ribosomal protein S18B    |
| MRPS18C | ENSG00000163319 | mitochondrial ribosomal protein S18C    |
| MRPS2   | ENSG00000122140 | mitochondrial ribosomal protein S2      |
| MRPS21  | ENSG00000266472 | mitochondrial ribosomal protein S21     |
| MRPS22  | ENSG00000175110 | mitochondrial ribosomal protein S22     |
| MRPS23  | ENSG00000181610 | mitochondrial ribosomal protein S23     |
| MRPS24  | ENSG00000062582 | mitochondrial ribosomal protein S24     |
| MRPS25  | ENSG00000131368 | mitochondrial ribosomal protein S25     |
| MRPS26  | ENSG00000125901 | mitochondrial ribosomal protein S26     |
| MRPS27  | ENSG00000113048 | mitochondrial ribosomal protein S27     |
| MRPS28  | ENSG00000147586 | mitochondrial ribosomal protein S28     |
| MRPS30  | ENSG00000112996 | mitochondrial ribosomal protein S30     |
| MRPS31  | ENSG00000102738 | mitochondrial ribosomal protein S31     |
| MRPS33  | ENSG00000090263 | mitochondrial ribosomal protein S33     |
| MRPS34  | ENSG00000074071 | mitochondrial ribosomal protein S34     |
| MRPS35  | ENSG00000061794 | mitochondrial ribosomal protein S35     |
| MRPS36  | ENSG00000134056 | mitochondrial ribosomal protein S36     |
| MRPS5   | ENSG00000144029 | mitochondrial ribosomal protein S5      |
| MRPS6   | ENSG00000243927 | mitochondrial ribosomal protein S6      |
| MRPS7   | ENSG00000125445 | mitochondrial ribosomal protein S7      |
| MRPS9   | ENSG00000135972 | mitochondrial ribosomal protein S9      |
| MRRF    | ENSG00000148187 | mitochondrial ribosome recycling factor |

|         |                 |                                                                                                             |
|---------|-----------------|-------------------------------------------------------------------------------------------------------------|
| MRS2    | ENSG00000124532 | magnesium transporter MRS2                                                                                  |
| MSRA    | ENSG00000175806 | methionine sulfoxide reductase A                                                                            |
| MSRB2   | ENSG00000148450 | methionine sulfoxide reductase B2                                                                           |
| MSRB3   | ENSG00000174099 | methionine sulfoxide reductase B3                                                                           |
| MT-ATP6 | ENSG00000198899 | mitochondrially encoded ATP synthase membrane subunit 6                                                     |
| MT-ATP8 | ENSG00000228253 | mitochondrially encoded ATP synthase membrane subunit 8                                                     |
| MT-CO1  | ENSG00000198804 | mitochondrially encoded cytochrome c oxidase I                                                              |
| MT-CO2  | ENSG00000198712 | mitochondrially encoded cytochrome c oxidase II                                                             |
| MT-CO3  | ENSG00000198938 | mitochondrially encoded cytochrome c oxidase III                                                            |
| MT-CYB  | ENSG00000198727 | mitochondrially encoded cytochrome b                                                                        |
| MT-CYB  | ENSG00000198727 | mitochondrially encoded cytochrome b                                                                        |
| MT-ND1  | ENSG00000198888 | mitochondrially encoded NADH:ubiquinone oxidoreductase core subunit 1                                       |
| MT-ND2  | ENSG00000198763 | mitochondrially encoded NADH:ubiquinone oxidoreductase core subunit 2                                       |
| MT-ND3  | ENSG00000198840 | mitochondrially encoded NADH:ubiquinone oxidoreductase core subunit 3                                       |
| MT-ND4  | ENSG00000198886 | mitochondrially encoded NADH:ubiquinone oxidoreductase core subunit 4                                       |
| MT-ND4L | ENSG00000212907 | mitochondrially encoded NADH:ubiquinone oxidoreductase core subunit 4L                                      |
| MT-ND5  | ENSG00000198786 | mitochondrially encoded NADH:ubiquinone oxidoreductase core subunit 5                                       |
| MT-ND6  | ENSG00000198695 | mitochondrially encoded NADH:ubiquinone oxidoreductase core subunit 6                                       |
| MT-RNR2 | ENSG00000210082 | mitochondrially encoded 16S rRNA                                                                            |
| MTCH1   | ENSG00000137409 | mitochondrial carrier 1                                                                                     |
| MTERF4  | ENSG00000122085 | mitochondrial transcription termination factor 4                                                            |
| MTERFD1 | ENSG00000156469 | mitochondrial transcription termination factor 3                                                            |
| MTERFD2 | ENSG00000122085 | mitochondrial transcription termination factor 4                                                            |
| MTERFD3 | ENSG00000120832 | mitochondrial transcription termination factor 2                                                            |
| MTFMT   | ENSG00000103707 | mitochondrial methionyl-tRNA formyltransferase                                                              |
| MTFP1   | ENSG00000242114 | mitochondrial fission process 1                                                                             |
| MTFR2   | ENSG00000146410 | mitochondrial fission regulator 2                                                                           |
| MTG2    | ENSG00000101181 | mitochondrial ribosome associated GTPase 2                                                                  |
| MTHFD1  | ENSG00000100714 | methylenetetrahydrofolate dehydrogenase cyclohydrolase and formyltetrahydrofolate synthetase 1              |
| MTHFD1L | ENSG00000120254 | methylenetetrahydrofolate dehydrogenase (NADP+ dependent) 1 like                                            |
| MTHFD2  | ENSG00000065911 | methylenetetrahydrofolate dehydrogenase (NADP+ dependent) 2                                                 |
| MTHFD2L | ENSG00000163738 | methenyltetrahydrofolate cyclohydrolase<br>methylenetetrahydrofolate dehydrogenase (NADP+ dependent) 2 like |
| MTHFS   | ENSG00000136371 | methenyltetrahydrofolate synthetase                                                                         |
| MTIF2   | ENSG00000085760 | mitochondrial translational initiation factor 2                                                             |
| MTIF3   | ENSG00000122033 | mitochondrial translational initiation factor 3                                                             |
| MTO1    | ENSG00000135297 | mitochondrial tRNA translation optimization 1                                                               |
| MTPAP   | ENSG00000107951 | mitochondrial poly(A) polymerase                                                                            |
| MTRF1   | ENSG00000120662 | mitochondrial translation release factor 1                                                                  |
| MTUS1   | ENSG00000129422 | microtubule associated scaffold protein 1                                                                   |
| MTX1    | ENSG00000173171 | metaxin 1                                                                                                   |
| MTX2    | ENSG00000128654 | metaxin 2                                                                                                   |
| MUL1    | ENSG00000090432 | mitochondrial E3 ubiquitin protein ligase 1                                                                 |
| MUT     | ENSG00000146085 | methylmalonyl-CoA mutase                                                                                    |

|         |                 |                                                          |
|---------|-----------------|----------------------------------------------------------|
| MUTYH   | ENSG00000132781 | mutY DNA glycosylase                                     |
| MYCBP   | ENSG00000214114 | MYC binding protein                                      |
| MYL10   | ENSG00000106436 | myosin light chain 10                                    |
| MYO1C   | ENSG00000197879 | myosin IC                                                |
| NADK2   | ENSG00000152620 | NAD kinase 2 mitochondrial                               |
| NAGS    | ENSG00000161653 | N-acetylglutamate synthase                               |
| NAIF1   | ENSG00000171169 | nuclear apoptosis inducing factor 1                      |
| NAPG    | ENSG00000134265 | NSF attachment protein gamma                             |
| NARS    | ENSG00000134440 | asparaginyl-tRNA synthetase 1                            |
| NARS2   | ENSG00000137513 | asparaginyl-tRNA synthetase 2 mitochondrial              |
| NBR1    | ENSG00000188554 | NBR1 autophagy cargo receptor                            |
| NCBP1   | ENSG00000136937 | nuclear cap binding protein subunit 1                    |
| NCEH1   | ENSG00000144959 | neutral cholesterol ester hydrolase 1                    |
| NCOA4   | ENSG00000266412 | nuclear receptor coactivator 4                           |
| NDFIP2  | ENSG00000102471 | Nedd4 family interacting protein 2                       |
| NDUFA1  | ENSG00000125356 | NADH:ubiquinone oxidoreductase subunit A1                |
| NDUFA10 | ENSG00000130414 | NADH:ubiquinone oxidoreductase subunit A10               |
| NDUFA11 | ENSG00000174886 | NADH:ubiquinone oxidoreductase subunit A11               |
| NDUFA12 | ENSG00000184752 | NADH:ubiquinone oxidoreductase subunit A12               |
| NDUFA13 | ENSG00000186010 | NADH:ubiquinone oxidoreductase subunit A13               |
| NDUFA2  | ENSG00000131495 | NADH:ubiquinone oxidoreductase subunit A2                |
| NDUFA3  | ENSG00000170906 | NADH:ubiquinone oxidoreductase subunit A3                |
| NDUFA4  | ENSG00000189043 | NDUFA4 mitochondrial complex associated                  |
| NDUFA5  | ENSG00000128609 | NADH:ubiquinone oxidoreductase subunit A5                |
| NDUFA6  | ENSG00000184983 | NADH:ubiquinone oxidoreductase subunit A6                |
| NDUFA7  | ENSG00000267855 | NADH:ubiquinone oxidoreductase subunit A7                |
| NDUFA8  | ENSG00000119421 | NADH:ubiquinone oxidoreductase subunit A8                |
| NDUFA9  | ENSG00000139180 | NADH:ubiquinone oxidoreductase subunit A9                |
| NDUFAB1 | ENSG00000004779 | NADH:ubiquinone oxidoreductase subunit AB1               |
| NDUFAF1 | ENSG00000137806 | NADH:ubiquinone oxidoreductase complex assembly factor 1 |
| NDUFAF2 | ENSG00000164182 | NADH:ubiquinone oxidoreductase complex assembly factor 2 |
| NDUFAF3 | ENSG00000178057 | NADH:ubiquinone oxidoreductase complex assembly factor 3 |
| NDUFAF7 | ENSG00000003509 | NADH:ubiquinone oxidoreductase complex assembly factor 7 |
| NDUFB1  | ENSG00000183648 | NADH:ubiquinone oxidoreductase subunit B1                |
| NDUFB10 | ENSG00000140990 | NADH:ubiquinone oxidoreductase subunit B10               |
| NDUFB11 | ENSG00000147123 | NADH:ubiquinone oxidoreductase subunit B11               |
| NDUFB2  | ENSG00000090266 | NADH:ubiquinone oxidoreductase subunit B2                |
| NDUFB3  | ENSG00000119013 | NADH:ubiquinone oxidoreductase subunit B3                |
| NDUFB4  | ENSG00000065518 | NADH:ubiquinone oxidoreductase subunit B4                |
| NDUFB5  | ENSG00000136521 | NADH:ubiquinone oxidoreductase subunit B5                |
| NDUFB6  | ENSG00000165264 | NADH:ubiquinone oxidoreductase subunit B6                |
| NDUFB7  | ENSG00000099795 | NADH:ubiquinone oxidoreductase subunit B7                |
| NDUFB8  | ENSG00000166136 | NADH:ubiquinone oxidoreductase subunit B8                |
| NDUFB9  | ENSG00000147684 | NADH:ubiquinone oxidoreductase subunit B9                |
| NDUFC1  | ENSG00000109390 | NADH:ubiquinone oxidoreductase subunit C1                |
| NDUFC2  | ENSG00000151366 | NADH:ubiquinone oxidoreductase subunit C2                |
| NDUFS1  | ENSG00000023228 | NADH:ubiquinone oxidoreductase core subunit S1           |
| NDUFS2  | ENSG00000158864 | NADH:ubiquinone oxidoreductase core subunit S2           |
| NDUFS3  | ENSG00000213619 | NADH:ubiquinone oxidoreductase core subunit S3           |
| NDUFS4  | ENSG00000164258 | NADH:ubiquinone oxidoreductase subunit S4                |
| NDUFS5  | ENSG00000168653 | NADH:ubiquinone oxidoreductase subunit S5                |
| NDUFS6  | ENSG00000145494 | NADH:ubiquinone oxidoreductase subunit S6                |

|           |                 |                                                        |
|-----------|-----------------|--------------------------------------------------------|
| NDUFS7    | ENSG00000115286 | NADH:ubiquinone oxidoreductase core subunit S7         |
| NDUFS8    | ENSG00000110717 | NADH:ubiquinone oxidoreductase core subunit S8         |
| NDUFV1    | ENSG00000167792 | NADH:ubiquinone oxidoreductase core subunit V1         |
| NDUFV2    | ENSG00000178127 | NADH:ubiquinone oxidoreductase core subunit V2         |
| NDUFV3    | ENSG00000160194 | NADH:ubiquinone oxidoreductase subunit V3              |
| NEFH      | ENSG00000100285 | neurofilament heavy chain                              |
| NEU4      | ENSG00000204099 | neuraminidase 4                                        |
| NFKB1     | ENSG00000109320 | nuclear factor kappa B subunit 1                       |
| NFS1      | ENSG00000244005 | NFS1 cysteine desulfurase                              |
| NFU1      | ENSG00000169599 | NFU1 iron-sulfur cluster scaffold                      |
| NGB       | ENSG00000165553 | neuroglobin                                            |
| NGRN      | ENSG00000182768 | neugrin neurite outgrowth associated                   |
| NIF3L1    | ENSG00000196290 | NGG1 interacting factor 3 like 1                       |
| NIPSNAP1  | ENSG00000184117 | nipsnap homolog 1                                      |
| NIPSNAP3A | ENSG00000136783 | nipsnap homolog 3A                                     |
| NIPSNAP3B | ENSG00000165028 | nipsnap homolog 3B                                     |
| NIT1      | ENSG00000158793 | nitrilase 1                                            |
| NIT2      | ENSG00000114021 | nitrilase family member 2                              |
| NLN       | ENSG00000123213 | neurolysin                                             |
| NLRP5     | ENSG00000171487 | NLR family pyrin domain containing 5                   |
| NLRX1     | ENSG00000160703 | NLR family member X1                                   |
| NME1      | ENSG00000239672 | NME/NM23 nucleoside diphosphate kinase 1               |
| NME3      | ENSG00000103024 | NME/NM23 nucleoside diphosphate kinase 3               |
| NME4      | ENSG00000103202 | NME/NM23 nucleoside diphosphate kinase 4               |
| NMNAT3    | ENSG00000163864 | nicotinamide nucleotide adenylyltransferase 3          |
| NNT       | ENSG00000112992 | nicotinamide nucleotide transhydrogenase               |
| NOA1      | ENSG00000084092 | nitric oxide associated 1                              |
| NOL3      | ENSG00000140939 | nucleolar protein 3                                    |
| NOL6      | ENSG00000165271 | nucleolar protein 6                                    |
| NOP14     | ENSG00000087269 | NOP14 nucleolar protein                                |
| NOS1      | ENSG00000089250 | nitric oxide synthase 1                                |
| NOX4      | ENSG00000086991 | NADPH oxidase 4                                        |
| NPTX1     | ENSG00000171246 | neuronal pentraxin 1                                   |
| NRD1      | ENSG00000078618 | nardilysin convertase                                  |
| NSUN3     | ENSG00000178694 | NOP2/Sun RNA methyltransferase 3                       |
| NSUN4     | ENSG00000117481 | NOP2/Sun RNA methyltransferase 4                       |
| NT5C3A    | ENSG00000122643 | 5'-nucleotidase cytosolic IIIA                         |
| NT5DC2    | ENSG00000168268 | 5'-nucleotidase domain containing 2                    |
| NT5DC3    | ENSG00000111696 | 5'-nucleotidase domain containing 3                    |
| NT5M      | ENSG00000205309 | 5' 3'-nucleotidase mitochondrial                       |
| NTHL1     | ENSG00000065057 | nth like DNA glycosylase 1                             |
| NUBPL     | ENSG00000151413 | NUBP iron-sulfur cluster assembly factor mitochondrial |
| NUCB2     | ENSG00000070081 | nucleobindin 2                                         |
| NUDT1     | ENSG00000106268 | nudix hydrolase 1                                      |
| NUDT13    | ENSG00000166321 | nudix hydrolase 13                                     |
| NUDT19    | ENSG00000213965 | nudix hydrolase 19                                     |
| NUDT2     | ENSG00000164978 | nudix hydrolase 2                                      |
| NUDT5     | ENSG00000165609 | nudix hydrolase 5                                      |
| NUDT6     | ENSG00000170917 | nudix hydrolase 6                                      |
| NUDT8     | ENSG00000167799 | nudix hydrolase 8                                      |
| NUDT9     | ENSG00000170502 | nudix hydrolase 9                                      |
| NXNL1     | ENSG00000171773 | nucleoredoxin like 1                                   |

|         |                 |                                                                                                         |
|---------|-----------------|---------------------------------------------------------------------------------------------------------|
| OAS1    | ENSG00000089127 | 2'-5'-oligoadenylate synthetase 1                                                                       |
| OAS2    | ENSG00000111335 | 2'-5'-oligoadenylate synthetase 2                                                                       |
| OAT     | ENSG00000065154 | ornithine aminotransferase                                                                              |
| OBSCN   | ENSG00000154358 | obscurin cytoskeletal calmodulin and titin-interacting RhoGEF                                           |
| OCIAD1  | ENSG00000109180 | OCIA domain containing 1                                                                                |
| OCIAD2  | ENSG00000145247 | OCIA domain containing 2                                                                                |
| OGDH    | ENSG00000105953 | oxoglutarate dehydrogenase                                                                              |
| OGDHL   | ENSG00000197444 | oxoglutarate dehydrogenase L                                                                            |
| OGG1    | ENSG00000114026 | 8-oxoguanine DNA glycosylase                                                                            |
| OGT     | ENSG00000147162 | O-linked N-acetylglucosamine (GlcNAc) transferase                                                       |
| OLFM4   | ENSG00000102837 | olfactomedin 4                                                                                          |
| OMA1    | ENSG00000162600 | OMA1 zinc metallopeptidase                                                                              |
| OPA1    | ENSG00000198836 | OPA1 mitochondrial dynamin like GTPase                                                                  |
| OPA3    | ENSG00000125741 | outer mitochondrial membrane lipid metabolism regulator OPA3                                            |
| OPN1SW  | ENSG00000128617 | opsin 1 short wave sensitive                                                                            |
| OSBPL1A | ENSG00000141447 | oxysterol binding protein like 1A                                                                       |
| OSGEPL1 | ENSG00000128694 | O-sialoglycoprotein endopeptidase like 1                                                                |
| OTC     | ENSG00000036473 | ornithine transcarbamylase                                                                              |
| OXA1L   | ENSG00000155463 | OXA1L mitochondrial inner membrane protein                                                              |
| OXCT1   | ENSG00000083720 | 3-oxoacid CoA-transferase 1                                                                             |
| OXLD1   | ENSG00000204237 | oxidoreductase like domain containing 1                                                                 |
| OXNAD1  | ENSG00000154814 | oxidoreductase NAD binding domain containing 1                                                          |
| OXR1    | ENSG00000164830 | oxidation resistance 1                                                                                  |
| OXSM    | ENSG00000151093 | 3-oxoacyl-ACP synthase mitochondrial                                                                    |
| P4HA1   | ENSG00000122884 | prolyl 4-hydroxylase subunit alpha 1                                                                    |
| P4HB    | ENSG00000185624 | prolyl 4-hydroxylase subunit beta                                                                       |
| PABPC5  | ENSG00000174740 | poly(A) binding protein cytoplasmic 5                                                                   |
| PACRG   | ENSG00000112530 | parkin coregulated                                                                                      |
| PACS2   | ENSG00000179364 | phosphofurin acidic cluster sorting protein 2                                                           |
| PACSN2  | ENSG00000100266 | protein kinase C and casein kinase substrate in neurons 2                                               |
| PAICS   | ENSG00000128050 | phosphoribosylaminoimidazole carboxylase and<br>phosphoribosylaminoimidazolesuccinocarboxamide synthase |
| PAK7    | ENSG00000101349 | p21 (RAC1) activated kinase 5                                                                           |
| PAM16   | ENSG00000217930 | presequence translocase associated motor 16                                                             |
| PANK2   | ENSG00000125779 | pantothenate kinase 2                                                                                   |
| PARG    | ENSG00000227345 | poly(ADP-ribose) glycohydrolase                                                                         |
| PARK2   | ENSG00000185345 | parkin RBR E3 ubiquitin protein ligase                                                                  |
| PARK7   | ENSG00000116288 | Parkinsonism associated deglycase                                                                       |
| PARL    | ENSG00000175193 | presenilin associated rhomboid like                                                                     |
| PARS2   | ENSG00000162396 | prolyl-tRNA synthetase 2 mitochondrial                                                                  |
| PC      | ENSG00000173599 | pyruvate carboxylase                                                                                    |
| PCBD2   | ENSG00000132570 | pterin-4 alpha-carbinolamine dehydratase 2                                                              |
| PCCA    | ENSG00000175198 | propionyl-CoA carboxylase subunit alpha                                                                 |
| PCCB    | ENSG00000114054 | propionyl-CoA carboxylase subunit beta                                                                  |
| PCK2    | ENSG00000100889 | phosphoenolpyruvate carboxykinase 2 mitochondrial                                                       |
| PDF     | ENSG00000258429 | peptide deformylase mitochondrial                                                                       |
| PDHA1   | ENSG00000131828 | pyruvate dehydrogenase E1 subunit alpha 1                                                               |
| PDHA2   | ENSG00000163114 | pyruvate dehydrogenase E1 subunit alpha 2                                                               |
| PDHB    | ENSG00000168291 | pyruvate dehydrogenase E1 subunit beta                                                                  |
| PDHX    | ENSG00000110435 | pyruvate dehydrogenase complex component X                                                              |
| PDK1    | ENSG00000152256 | pyruvate dehydrogenase kinase 1                                                                         |
| PDK2    | ENSG00000005882 | pyruvate dehydrogenase kinase 2                                                                         |

|         |                 |                                                                         |
|---------|-----------------|-------------------------------------------------------------------------|
| PDK3    | ENSG00000067992 | pyruvate dehydrogenase kinase 3                                         |
| PDK4    | ENSG00000004799 | pyruvate dehydrogenase kinase 4                                         |
| PDP1    | ENSG00000164951 | pyruvate dehydrogenase phosphatase catalytic subunit 1                  |
| PDP2    | ENSG00000172840 | pyruvate dehydrogenase phosphatase catalytic subunit 2                  |
| PDPR    | ENSG00000090857 | pyruvate dehydrogenase phosphatase regulatory subunit                   |
| PDSS1   | ENSG00000148459 | decaprenyl diphosphate synthase subunit 1                               |
| PDSS2   | ENSG00000164494 | decaprenyl diphosphate synthase subunit 2                               |
| PECR    | ENSG00000115425 | peroxisomal trans-2-enoyl-CoA reductase                                 |
| PEMT    | ENSG00000133027 | phosphatidylethanolamine N-methyltransferase                            |
| PET100  | ENSG00000229833 | PET100 cytochrome c oxidase chaperone                                   |
| PET117  | ENSG00000232838 | PET117 cytochrome c oxidase chaperone                                   |
| PEX11B  | ENSG00000131779 | peroxisomal biogenesis factor 11 beta                                   |
| PEX5    | ENSG00000139197 | peroxisomal biogenesis factor 5                                         |
| PFDN2   | ENSG00000143256 | prefoldin subunit 2                                                     |
| PFDN4   | ENSG00000101132 | prefoldin subunit 4                                                     |
| PGAM5   | ENSG00000247077 | PGAM family member 5 mitochondrial serine/threonine protein phosphatase |
| PGS1    | ENSG00000087157 | phosphatidylglycerophosphate synthase 1                                 |
| PHB     | ENSG00000167085 | prohibitin 1                                                            |
| PHB2    | ENSG00000215021 | prohibitin 2                                                            |
| PHYH    | ENSG00000107537 | phytanoyl-CoA 2-hydroxylase                                             |
| PHYKPL  | ENSG00000175309 | 5-phosphohydroxy-L-lysine phospho-lyase                                 |
| PI4K2A  | ENSG00000155252 | phosphatidylinositol 4-kinase type 2 alpha                              |
| PI4KA   | ENSG00000241973 | phosphatidylinositol 4-kinase alpha                                     |
| PICK1   | ENSG00000100151 | protein interacting with PRKCA 1                                        |
| PIF1    | ENSG00000140451 | PIF1 5'-to-3' DNA helicase                                              |
| PIN4    | ENSG00000102309 | peptidylprolyl cis/trans isomerase NIMA-interacting 4                   |
| PINK1   | ENSG00000158828 | PTEN induced kinase 1                                                   |
| PISD    | ENSG00000241878 | phosphatidylserine decarboxylase                                        |
| PITRM1  | ENSG00000107959 | pitrilysin metalloproteinase 1                                          |
| PKM     | ENSG00000067225 | pyruvate kinase M1/2                                                    |
| PLA2G15 | ENSG00000103066 | phospholipase A2 group XV                                               |
| PLA2G2A | ENSG00000188257 | phospholipase A2 group IIA                                              |
| PLGRKT  | ENSG00000107020 | plasminogen receptor with a C-terminal lysine                           |
| PLIN5   | ENSG00000214456 | perilipin 5                                                             |
| PLN     | ENSG00000198523 | phospholamban                                                           |
| PLSCR3  | ENSG00000187838 | phospholipid scramblase 3                                               |
| PMAIP1  | ENSG00000141682 | phorbol-12-myristate-13-acetate-induced protein 1                       |
| PMPCA   | ENSG00000165688 | peptidase mitochondrial processing subunit alpha                        |
| PMPCB   | ENSG00000105819 | peptidase mitochondrial processing subunit beta                         |
| PNKD    | ENSG00000127838 | PNKD metallo-beta-lactamase domain containing                           |
| PNPLA7  | ENSG00000130653 | patatin like phospholipase domain containing 7                          |
| PNPLA8  | ENSG00000135241 | patatin like phospholipase domain containing 8                          |
| PNPO    | ENSG00000108439 | pyridoxamine 5'-phosphate oxidase                                       |
| PNPT1   | ENSG00000138035 | polyribonucleotide nucleotidyltransferase 1                             |
| POLD3   | ENSG00000077514 | DNA polymerase delta 3 accessory subunit                                |
| POLDIP2 | ENSG00000004142 | DNA polymerase delta interacting protein 2                              |
| POLG    | ENSG00000140521 | DNA polymerase gamma catalytic subunit                                  |
| POLG2   | ENSG00000256525 | DNA polymerase gamma 2 accessory subunit                                |
| POLRMT  | ENSG00000099821 | RNA polymerase mitochondrial                                            |
| PON2    | ENSG00000105854 | paraoxonase 2                                                           |
| POR     | ENSG00000127948 | cytochrome p450 oxidoreductase                                          |

|          |                 |                                                                     |
|----------|-----------------|---------------------------------------------------------------------|
| PPA2     | ENSG00000138777 | inorganic pyrophosphatase 2                                         |
| PPARGC1B | ENSG00000155846 | PPARG coactivator 1 beta                                            |
| PPIF     | ENSG00000108179 | peptidylprolyl isomerase F                                          |
| PPL      | ENSG00000118898 | periplakin                                                          |
| PPM1E    | ENSG00000175175 | protein phosphatase Mg <sup>2+</sup> /Mn <sup>2+</sup> dependent 1E |
| PPM1K    | ENSG00000163644 | protein phosphatase Mg <sup>2+</sup> /Mn <sup>2+</sup> dependent 1K |
| PPOX     | ENSG00000143224 | protoporphyrinogen oxidase                                          |
| PPP1CC   | ENSG00000186298 | protein phosphatase 1 catalytic subunit gamma                       |
| PPP2CA   | ENSG00000113575 | protein phosphatase 2 catalytic subunit alpha                       |
| PPP2R1A  | ENSG00000105568 | protein phosphatase 2 scaffold subunit Aalpha                       |
| PPP2R2B  | ENSG00000156475 | protein phosphatase 2 regulatory subunit Bbeta                      |
| PPP3CA   | ENSG00000138814 | protein phosphatase 3 catalytic subunit alpha                       |
| PPTC7    | ENSG00000196850 | protein phosphatase targeting COQ7                                  |
| PPWD1    | ENSG00000113593 | peptidylprolyl isomerase domain and WD repeat containing 1          |
| PRDX2    | ENSG00000167815 | peroxiredoxin 2                                                     |
| PRDX3    | ENSG00000165672 | peroxiredoxin 3                                                     |
| PRDX4    | ENSG00000123131 | peroxiredoxin 4                                                     |
| PRDX5    | ENSG00000126432 | peroxiredoxin 5                                                     |
| PRDX6    | ENSG00000117592 | peroxiredoxin 6                                                     |
| PRELID1  | ENSG00000169230 | PRELI domain containing 1                                           |
| PRELID2  | ENSG00000186314 | PRELI domain containing 2                                           |
| PREPL    | ENSG00000138078 | prolyl endopeptidase like                                           |
| PRKACA   | ENSG00000072062 | protein kinase cAMP-activated catalytic subunit alpha               |
| PRKCA    | ENSG00000154229 | protein kinase C alpha                                              |
| PRKCD    | ENSG00000163932 | protein kinase C delta                                              |
| PRKCE    | ENSG00000171132 | protein kinase C epsilon                                            |
| PRODH    | ENSG00000100033 | proline dehydrogenase 1                                             |
| PRODH2   | ENSG00000250799 | proline dehydrogenase 2                                             |
| PROSC    | ENSG00000147471 | pyridoxal phosphate binding protein                                 |
| PRR5L    | ENSG00000135362 | proline rich 5 like                                                 |
| PRSS35   | ENSG00000146250 | serine protease 35                                                  |
| PSAP     | ENSG00000197746 | prosaposin                                                          |
| PSEN1    | ENSG00000080815 | presenilin 1                                                        |
| PSMA6    | ENSG00000100902 | proteasome 20S subunit alpha 6                                      |
| PSMB3    | ENSG00000277791 | proteasome 20S subunit beta 3                                       |
| PSTK     | ENSG00000179988 | phosphoseryl-tRNA kinase                                            |
| PTCD1    | ENSG00000106246 | pentatricopeptide repeat domain 1                                   |
| PTCD2    | ENSG00000049883 | pentatricopeptide repeat domain 2                                   |
| PTCD3    | ENSG00000132300 | pentatricopeptide repeat domain 3                                   |
| PTEN     | ENSG00000171862 | phosphatase and tensin homolog                                      |
| PTGES2   | ENSG00000148334 | prostaglandin E synthase 2                                          |
| PTPMT1   | ENSG00000110536 | protein tyrosine phosphatase mitochondrial 1                        |
| PTPN11   | ENSG00000179295 | protein tyrosine phosphatase non-receptor type 11                   |
| PTPN4    | ENSG00000088179 | protein tyrosine phosphatase non-receptor type 4                    |
| PTRF     | ENSG00000177469 | caveolae associated protein 1                                       |
| PTRH1    | ENSG00000187024 | peptidyl-tRNA hydrolase 1 homolog                                   |
| PTRH2    | ENSG00000141378 | peptidyl-tRNA hydrolase 2                                           |
| PTS      | ENSG00000150787 | 6-pyruvoyltetrahydropterin synthase                                 |
| PUS1     | ENSG00000177192 | pseudouridine synthase 1                                            |
| PUSL1    | ENSG00000169972 | pseudouridine synthase like 1                                       |
| PXMP2    | ENSG00000176894 | peroxisomal membrane protein 2                                      |
| PXMP4    | ENSG00000101417 | peroxisomal membrane protein 4                                      |

|           |                 |                                                     |
|-----------|-----------------|-----------------------------------------------------|
| PYCARD    | ENSG00000103490 | PYD and CARD domain containing                      |
| PYCR1     | ENSG00000183010 | pyrroline-5-carboxylate reductase 1                 |
| Q6ZSR3    |                 |                                                     |
| QRSL1     | ENSG00000130348 | glutamyl-tRNA amidotransferase subunit QRSL1        |
| QTRT1     | ENSG00000213339 | queuine tRNA-ribosyltransferase catalytic subunit 1 |
| QTRTD1    | ENSG00000151576 | queuine tRNA-ribosyltransferase accessory subunit 2 |
| RAB11A    | ENSG00000103769 | RAB11A member RAS oncogene family                   |
| RAB11B    | ENSG00000185236 | RAB11B member RAS oncogene family                   |
| RAB11FIP5 | ENSG00000135631 | RAB11 family interacting protein 5                  |
| RAB1B     | ENSG00000174903 | RAB1B member RAS oncogene family                    |
| RAB24     | ENSG00000169228 | RAB24 member RAS oncogene family                    |
| RAB32     | ENSG00000118508 | RAB32 member RAS oncogene family                    |
| RAB35     | ENSG00000111737 | RAB35 member RAS oncogene family                    |
| RAB3D     | ENSG00000105514 | RAB3D member RAS oncogene family                    |
| RAB40AL   | ENSG00000102128 | RAB40A like                                         |
| RAB8B     | ENSG00000166128 | RAB8B member RAS oncogene family                    |
| RAD51     | ENSG00000051180 | RAD51 recombinase                                   |
| RAD51C    | ENSG00000108384 | RAD51 paralog C                                     |
| RAI14     | ENSG00000039560 | retinoic acid induced 14                            |
| RANBP2    | ENSG00000153201 | RAN binding protein 2                               |
| RAP1GDS1  | ENSG00000138698 | Rap1 GTPase-GDP dissociation stimulator 1           |
| RARS      | ENSG00000113643 | arginyl-tRNA synthetase 1                           |
| RARS2     | ENSG00000146282 | arginyl-tRNA synthetase 2 mitochondrial             |
| RBFA      | ENSG00000101546 | ribosome binding factor A                           |
| RCC1L     | ENSG00000274523 | RCC1 like                                           |
| RCN2      | ENSG00000117906 | reticulocalbin 2                                    |
| RDH11     | ENSG00000072042 | retinol dehydrogenase 11                            |
| RDH13     | ENSG00000160439 | retinol dehydrogenase 13                            |
| RDH14     | ENSG00000240857 | retinol dehydrogenase 14                            |
| RECQL4    | ENSG00000160957 | RecQ like helicase 4                                |
| REEP1     | ENSG00000068615 | receptor accessory protein 1                        |
| REXO2     | ENSG00000076043 | RNA exonuclease 2                                   |
| RFK       | ENSG00000135002 | riboflavin kinase                                   |
| RGS2      | ENSG00000116741 | regulator of G protein signaling 2                  |
| RHBDD1    | ENSG00000144468 | rhomboid domain containing 1                        |
| RHOA      | ENSG00000067560 | ras homolog family member A                         |
| RHOT1     | ENSG00000126858 | ras homolog family member T1                        |
| RHOT2     | ENSG00000140983 | ras homolog family member T2                        |
| RILP      | ENSG00000167705 | Rab interacting lysosomal protein                   |
| RIPK1     | ENSG00000137275 | receptor interacting serine/threonine kinase 1      |
| RMDN3     | ENSG00000137824 | regulator of microtubule dynamics 3                 |
| RMND1     | ENSG00000155906 | required for meiotic nuclear division 1 homolog     |
| RNASEH1   | ENSG00000171865 | ribonuclease H1                                     |
| RNASEL    | ENSG00000135828 | ribonuclease L                                      |
| RNF168    | ENSG00000163961 | ring finger protein 168                             |
| RNF5      | ENSG00000204308 | ring finger protein 5                               |
| RNMTL1    | ENSG00000171861 | mitochondrial rRNA methyltransferase 3              |
| ROMO1     | ENSG00000125995 | reactive oxygen species modulator 1                 |
| RPIA      | ENSG00000153574 | ribose 5-phosphate isomerase A                      |
| RPL10A    | ENSG00000198755 | ribosomal protein L10a                              |
| RPL34     | ENSG00000109475 | ribosomal protein L34                               |
| RPL35A    | ENSG00000182899 | ribosomal protein L35a                              |



|          |                 |                                                         |
|----------|-----------------|---------------------------------------------------------|
| RPP14    | ENSG00000163684 | ribonuclease P/MRP subunit p14                          |
| RPS14    | ENSG00000164587 | ribosomal protein S14                                   |
| RPS15A   | ENSG00000134419 | ribosomal protein S15a                                  |
| RPS18    | ENSG00000231500 | ribosomal protein S18                                   |
| RPS6KB1  | ENSG00000108443 | ribosomal protein S6 kinase B1                          |
| RPUSD3   | ENSG00000156990 | RNA pseudouridine synthase D3                           |
| RPUSD4   | ENSG00000165526 | RNA pseudouridine synthase D4                           |
| RRP15    | ENSG00000067533 | ribosomal RNA processing 15 homolog                     |
| RSAD1    | ENSG00000136444 | radical S-adenosyl methionine domain containing 1       |
| RSAD2    | ENSG00000134321 | radical S-adenosyl methionine domain containing 2       |
| RTN4IP1  | ENSG00000130347 | reticulon 4 interacting protein 1                       |
| SACS     | ENSG00000151835 | saccin molecular chaperone                              |
| SAMM50   | ENSG00000100347 | SAMM50 sorting and assembly machinery component         |
| SARDH    | ENSG00000123453 | sarcosine dehydrogenase                                 |
| SARM1    | ENSG00000004139 | sterile alpha and TIR motif containing 1                |
| SARS     | ENSG00000031698 | seryl-tRNA synthetase 1                                 |
| SARS2    | ENSG00000104835 | seryl-tRNA synthetase 2 mitochondrial                   |
| SCCPDH   | ENSG00000143653 | saccharopine dehydrogenase (putative)                   |
| SCO1     | ENSG00000133028 | synthesis of cytochrome C oxidase 1                     |
| SCO2     | ENSG00000284194 | synthesis of cytochrome C oxidase 2                     |
| SCP2     | ENSG00000116171 | sterol carrier protein 2                                |
| SDHA     | ENSG00000073578 | succinate dehydrogenase complex flavoprotein subunit A  |
| SDHAF1   | ENSG00000205138 | succinate dehydrogenase complex assembly factor 1       |
| SDHAF2   | ENSG00000167985 | succinate dehydrogenase complex assembly factor 2       |
| SDHB     | ENSG00000117118 | succinate dehydrogenase complex iron sulfur subunit B   |
| SDHC     | ENSG00000143252 | succinate dehydrogenase complex subunit C               |
| SDHD     | ENSG00000204370 | succinate dehydrogenase complex subunit D               |
| SDR39U1  | ENSG00000100445 | short chain dehydrogenase/reductase family 39U member 1 |
| SDS      | ENSG00000135094 | serine dehydratase                                      |
| SDSL     | ENSG00000139410 | serine dehydratase like                                 |
| SECISBP2 | ENSG00000187742 | SECIS binding protein 2                                 |
| SELO     | ENSG00000073169 | selenoprotein O                                         |
| SERAC1   | ENSG00000122335 | serine active site containing 1                         |
| SERHL2   | ENSG00000183569 | serine hydrolase like 2                                 |
| SETD9    | ENSG00000155542 | SET domain containing 9                                 |
| SFXN1    | ENSG00000164466 | sideroflexin 1                                          |
| SFXN2    | ENSG00000156398 | sideroflexin 2                                          |
| SFXN3    | ENSG00000107819 | sideroflexin 3                                          |
| SFXN4    | ENSG00000183605 | sideroflexin 4                                          |
| SFXN5    | ENSG00000144040 | sideroflexin 5                                          |
| SGK1     | ENSG00000118515 | serum/glucocorticoid regulated kinase 1                 |
| SH3BP5   | ENSG00000131370 | SH3 domain binding protein 5                            |
| SHC1     | ENSG00000160691 | SHC adaptor protein 1                                   |
| SHMT1    | ENSG00000176974 | serine hydroxymethyltransferase 1                       |
| SHMT2    | ENSG00000182199 | serine hydroxymethyltransferase 2                       |
| SIAH3    | ENSG00000215475 | siah E3 ubiquitin protein ligase family member 3        |
| SIRT1    | ENSG00000096717 | sirtuin 1                                               |
| SIRT3    | ENSG00000142082 | sirtuin 3                                               |
| SIRT4    | ENSG00000089163 | sirtuin 4                                               |
| SIRT5    | ENSG00000124523 | sirtuin 5                                               |
| SIVA1    | ENSG00000184990 | SIVA1 apoptosis inducing factor                         |
| SLC16A1  | ENSG00000155380 | solute carrier family 16 member 1                       |

|          |                 |                                    |
|----------|-----------------|------------------------------------|
| SLC16A11 | ENSG00000174326 | solute carrier family 16 member 11 |
| SLC16A7  | ENSG00000118596 | solute carrier family 16 member 7  |
| SLC22A4  | ENSG00000197208 | solute carrier family 22 member 4  |
| SLC25A1  | ENSG00000100075 | solute carrier family 25 member 1  |
| SLC25A10 | ENSG00000183048 | solute carrier family 25 member 10 |
| SLC25A11 | ENSG00000108528 | solute carrier family 25 member 11 |
| SLC25A12 | ENSG00000115840 | solute carrier family 25 member 12 |
| SLC25A13 | ENSG00000004864 | solute carrier family 25 member 13 |
| SLC25A14 | ENSG00000102078 | solute carrier family 25 member 14 |
| SLC25A15 | ENSG00000102743 | solute carrier family 25 member 15 |
| SLC25A16 | ENSG00000122912 | solute carrier family 25 member 16 |
| SLC25A17 | ENSG00000100372 | solute carrier family 25 member 17 |
| SLC25A18 | ENSG00000182902 | solute carrier family 25 member 18 |
| SLC25A19 | ENSG00000125454 | solute carrier family 25 member 19 |
| SLC25A20 | ENSG00000178537 | solute carrier family 25 member 20 |
| SLC25A21 | ENSG00000183032 | solute carrier family 25 member 21 |
| SLC25A22 | ENSG00000177542 | solute carrier family 25 member 22 |
| SLC25A23 | ENSG00000125648 | solute carrier family 25 member 23 |
| SLC25A24 | ENSG00000085491 | solute carrier family 25 member 24 |
| SLC25A25 | ENSG00000148339 | solute carrier family 25 member 25 |
| SLC25A26 | ENSG00000144741 | solute carrier family 25 member 26 |
| SLC25A27 | ENSG00000153291 | solute carrier family 25 member 27 |
| SLC25A28 | ENSG00000155287 | solute carrier family 25 member 28 |
| SLC25A29 | ENSG00000197119 | solute carrier family 25 member 29 |
| SLC25A3  | ENSG00000075415 | solute carrier family 25 member 3  |
| SLC25A30 | ENSG00000174032 | solute carrier family 25 member 30 |
| SLC25A31 | ENSG00000151475 | solute carrier family 25 member 31 |
| SLC25A32 | ENSG00000164933 | solute carrier family 25 member 32 |
| SLC25A33 | ENSG00000171612 | solute carrier family 25 member 33 |
| SLC25A34 | ENSG00000162461 | solute carrier family 25 member 34 |
| SLC25A35 | ENSG00000125434 | solute carrier family 25 member 35 |
| SLC25A36 | ENSG00000114120 | solute carrier family 25 member 36 |
| SLC25A37 | ENSG00000147454 | solute carrier family 25 member 37 |
| SLC25A38 | ENSG00000144659 | solute carrier family 25 member 38 |
| SLC25A39 | ENSG00000013306 | solute carrier family 25 member 39 |
| SLC25A4  | ENSG00000151729 | solute carrier family 25 member 4  |
| SLC25A40 | ENSG00000075303 | solute carrier family 25 member 40 |
| SLC25A41 | ENSG00000181240 | solute carrier family 25 member 41 |
| SLC25A42 | ENSG00000181035 | solute carrier family 25 member 42 |
| SLC25A43 | ENSG00000077713 | solute carrier family 25 member 43 |
| SLC25A44 | ENSG00000160785 | solute carrier family 25 member 44 |
| SLC25A45 | ENSG00000162241 | solute carrier family 25 member 45 |
| SLC25A46 | ENSG00000164209 | solute carrier family 25 member 46 |
| SLC25A47 | ENSG00000140107 | solute carrier family 25 member 47 |
| SLC25A48 | ENSG00000145832 | solute carrier family 25 member 48 |
| SLC25A53 | ENSG00000269743 | solute carrier family 25 member 53 |
| SLC25A6  | ENSG00000169100 | solute carrier family 25 member 6  |
| SLC27A2  | ENSG00000140284 | solute carrier family 27 member 2  |
| SLC27A3  | ENSG00000143554 | solute carrier family 27 member 3  |
| SLC30A6  | ENSG00000152683 | solute carrier family 30 member 6  |
| SLC30A9  | ENSG00000014824 | solute carrier family 30 member 9  |
| SLC35F6  | ENSG00000213699 | solute carrier family 35 member F6 |

|         |                 |                                                             |
|---------|-----------------|-------------------------------------------------------------|
| SLC37A4 | ENSG00000137700 | solute carrier family 37 member 4                           |
| SLC8A3  | ENSG00000100678 | solute carrier family 8 member A3                           |
| SLC9A1  | ENSG00000090020 | solute carrier family 9 member A1                           |
| SLC9A6  | ENSG00000198689 | solute carrier family 9 member A6                           |
| SLIRP   | ENSG00000119705 | SRA stem-loop interacting RNA binding protein               |
| SLIT3   | ENSG00000184347 | slit guidance ligand 3                                      |
| SLMO1   | ENSG00000141391 | PRELI domain containing 3A                                  |
| SLMO2   | ENSG00000101166 | PRELI domain containing 3B                                  |
| SMAD1   | ENSG00000170365 | SMAD family member 1                                        |
| SMIM4   | ENSG00000168273 | small integral membrane protein 4                           |
| SNAP29  | ENSG00000099940 | synaptosome associated protein 29                           |
| SNCA    | ENSG00000145335 | synuclein alpha                                             |
| SNCB    | ENSG00000074317 | synuclein beta                                              |
| SND1    | ENSG00000197157 | staphylococcal nuclease and tudor domain containing 1       |
| SOD1    | ENSG00000142168 | superoxide dismutase 1                                      |
| SOD2    | ENSG00000112096 | superoxide dismutase 2                                      |
| SORD    | ENSG00000140263 | sorbitol dehydrogenase                                      |
| SOX4    | ENSG00000124766 | SRY-box transcription factor 4                              |
| SPARC   | ENSG00000113140 | secreted protein acidic and cysteine rich                   |
| SPATA19 | ENSG00000166118 | spermatogenesis associated 19                               |
| SPATA20 | ENSG00000006282 | spermatogenesis associated 20                               |
| SPATA5  | ENSG00000145375 | spermatogenesis associated 5                                |
| SPG7    | ENSG00000197912 | SPG7 matrix AAA peptidase subunit paraplegin                |
| SPHKAP  | ENSG00000153820 | SPHK1 interactor AKAP domain containing                     |
| SPR     | ENSG00000116096 | sepiapterin reductase                                       |
| SPRYD4  | ENSG00000176422 | SPRY domain containing 4                                    |
| SPTLC2  | ENSG00000100596 | serine palmitoyltransferase long chain base subunit 2       |
| SQRDL   | ENSG00000137767 | sulfide quinone oxidoreductase                              |
| SRC     | ENSG00000197122 | SRC proto-oncogene non-receptor tyrosine kinase             |
| SREK1   | ENSG00000153914 | splicing regulatory glutamic acid and lysine rich protein 1 |
| SRP19   | ENSG00000153037 | signal recognition particle 19                              |
| SSBP1   | ENSG00000106028 | single stranded DNA binding protein 1                       |
| STAP1   | ENSG00000035720 | signal transducing adaptor family member 1                  |
| STAR    | ENSG00000147465 | steroidogenic acute regulatory protein                      |
| STARD13 | ENSG00000133121 | StAR related lipid transfer domain containing 13            |
| STARD3  | ENSG00000131748 | StAR related lipid transfer domain containing 3             |
| STARD7  | ENSG00000084090 | StAR related lipid transfer domain containing 7             |
| STK11   | ENSG00000118046 | serine/threonine kinase 11                                  |
| STOM    | ENSG00000148175 | stomatin                                                    |
| STOML1  | ENSG00000067221 | stomatin like 1                                             |
| STOML2  | ENSG00000165283 | stomatin like 2                                             |
| STX17   | ENSG00000136874 | syntaxin 17                                                 |
| STXBP1  | ENSG00000136854 | syntaxin binding protein 1                                  |
| SUCLA2  | ENSG00000136143 | succinate-CoA ligase ADP-forming subunit beta               |
| SUCLG1  | ENSG00000163541 | succinate-CoA ligase GDP/ADP-forming subunit alpha          |
| SUGCT   | ENSG00000175600 | succinyl-CoA:glutarate-CoA transferase                      |
| SUOX    | ENSG00000139531 | sulfite oxidase                                             |
| SUPV3L1 | ENSG00000156502 | Suv3 like RNA helicase                                      |
| SURF1   | ENSG00000148290 | SURF1 cytochrome c oxidase assembly factor                  |
| SYNE2   | ENSG00000054654 | spectrin repeat containing nuclear envelope protein 2       |
| SYNJ2BP | ENSG00000213463 | synaptojanin 2 binding protein                              |
| TACO1   | ENSG00000136463 | translational activator of cytochrome c oxidase I           |

|          |                 |                                                                            |
|----------|-----------------|----------------------------------------------------------------------------|
| TANGO2   | ENSG00000183597 | transport and golgi organization 2 homolog                                 |
| TAP1     | ENSG00000168394 | transporter 1 ATP binding cassette subfamily B member                      |
| TARS     | ENSG00000113407 | threonyl-tRNA synthetase 1                                                 |
| TARS2    | ENSG00000143374 | threonyl-tRNA synthetase 2 mitochondrial                                   |
| TAT      | ENSG00000198650 | tyrosine aminotransferase                                                  |
| TATDN3   | ENSG00000203705 | TatD DNase domain containing 3                                             |
| TAZ      | ENSG00000102125 | tafazzin phospholipid-lysophospholipid transacylase                        |
| TBC1D15  | ENSG00000121749 | TBC1 domain family member 15                                               |
| TCAIM    | ENSG00000179152 | T cell activation inhibitor mitochondrial                                  |
| TCHP     | ENSG00000139437 | trichoplein keratin filament binding                                       |
| TCIRG1   | ENSG00000110719 | T cell immune regulator 1 ATPase H <sup>+</sup> transporting V0 subunit a3 |
| TDH      | ENSG00000154316 | L-threonine dehydrogenase (pseudogene)                                     |
| TEFM     | ENSG00000172171 | transcription elongation factor mitochondrial                              |
| TFAM     | ENSG00000108064 | transcription factor A mitochondrial                                       |
| TFB1M    | ENSG00000029639 | transcription factor B1 mitochondrial                                      |
| TFB2M    | ENSG00000162851 | transcription factor B2 mitochondrial                                      |
| TGM2     | ENSG00000198959 | transglutaminase 2                                                         |
| TH       | ENSG00000180176 | tyrosine hydroxylase                                                       |
| THEM4    | ENSG00000159445 | thioesterase superfamily member 4                                          |
| THG1L    | ENSG00000113272 | tRNA-histidine guanylyltransferase 1 like                                  |
| THNSL1   | ENSG00000185875 | threonine synthase like 1                                                  |
| TIMM10B  | ENSG00000132286 | translocase of inner mitochondrial membrane 10B                            |
| TIMM13   | ENSG00000099800 | translocase of inner mitochondrial membrane 13                             |
| TIMM17A  | ENSG00000134375 | translocase of inner mitochondrial membrane 17A                            |
| TIMM21   | ENSG00000075336 | translocase of inner mitochondrial membrane 21                             |
| TIMM22   | ENSG00000177370 | translocase of inner mitochondrial membrane 22                             |
| TIMM23   | ENSG00000265354 | translocase of inner mitochondrial membrane 23                             |
| TIMM44   | ENSG00000104980 | translocase of inner mitochondrial membrane 44                             |
| TIMM50   | ENSG00000105197 | translocase of inner mitochondrial membrane 50                             |
| TIMM8A   | ENSG00000126953 | translocase of inner mitochondrial membrane 8A                             |
| TIMM8B   | ENSG00000150779 | translocase of inner mitochondrial membrane 8 homolog B                    |
| TIMM9    | ENSG00000100575 | translocase of inner mitochondrial membrane 9                              |
| TIMMDC1  | ENSG00000113845 | translocase of inner mitochondrial membrane domain containing 1            |
| TK2      | ENSG00000166548 | thymidine kinase 2                                                         |
| TKT      | ENSG00000163931 | transketolase                                                              |
| TMBIM4   | ENSG00000155957 | transmembrane BAX inhibitor motif containing 4                             |
| TMEM11   | ENSG00000178307 | transmembrane protein 11                                                   |
| TMEM126A | ENSG00000171202 | transmembrane protein 126A                                                 |
| TMEM126B | ENSG00000171204 | transmembrane protein 126B                                                 |
| TMEM143  | ENSG00000161558 | transmembrane protein 143                                                  |
| TMEM14C  | ENSG00000111843 | transmembrane protein 14C                                                  |
| TMEM160  | ENSG00000130748 | transmembrane protein 160                                                  |
| TMEM177  | ENSG00000144120 | transmembrane protein 177                                                  |
| TMEM186  | ENSG00000184857 | transmembrane protein 186                                                  |
| TMEM205  | ENSG00000105518 | transmembrane protein 205                                                  |
| TMEM70   | ENSG00000175606 | transmembrane protein 70                                                   |
| TMEM8B   | ENSG00000137103 | transmembrane protein 8B                                                   |
| TMLHE    | ENSG00000185973 | trimethyllysine hydroxylase epsilon                                        |
| TMTC1    | ENSG00000133687 | transmembrane O-mannosyltransferase targeting cadherins 1                  |
| TNNC1    | ENSG00000114854 | troponin C1 slow skeletal and cardiac type                                 |
| TOMM20   | ENSG00000173726 | translocase of outer mitochondrial membrane 20                             |
| TOMM22   | ENSG00000100216 | translocase of outer mitochondrial membrane 22                             |

|          |                 |                                                                |
|----------|-----------------|----------------------------------------------------------------|
| TOMM34   | ENSG00000025772 | translocase of outer mitochondrial membrane 34                 |
| TOMM40   | ENSG00000130204 | translocase of outer mitochondrial membrane 40                 |
| TOMM40L  | ENSG00000158882 | translocase of outer mitochondrial membrane 40 like            |
| TOMM5    | ENSG00000175768 | translocase of outer mitochondrial membrane 5                  |
| TOMM6    | ENSG00000214736 | translocase of outer mitochondrial membrane 6                  |
| TOMM7    | ENSG00000196683 | translocase of outer mitochondrial membrane 7                  |
| TOMM70A  | ENSG00000154174 | translocase of outer mitochondrial membrane 70                 |
| TOP1MT   | ENSG00000184428 | DNA topoisomerase I mitochondrial                              |
| TOP3A    | ENSG00000177302 | DNA topoisomerase III alpha                                    |
| TP53     | ENSG00000141510 | tumor protein p53                                              |
| TP53AIP1 | ENSG00000120471 | tumor protein p53 regulated apoptosis inducing protein 1       |
| TPI1     | ENSG00000111669 | triosephosphate isomerase 1                                    |
| TPO      | ENSG00000115705 | thyroid peroxidase                                             |
| TPP1     | ENSG00000166340 | tripeptidyl peptidase 1                                        |
| TRAF3    | ENSG00000131323 | TNF receptor associated factor 3                               |
| TRAF6    | ENSG00000175104 | TNF receptor associated factor 6                               |
| TRAK1    | ENSG00000182606 | trafficking kinesin protein 1                                  |
| TRAK2    | ENSG00000115993 | trafficking kinesin protein 2                                  |
| TRAK2    | ENSG00000115993 | trafficking kinesin protein 2                                  |
| TRAP1    | ENSG00000126602 | TNF receptor associated protein 1                              |
| TRIAP1   | ENSG00000170855 | TP53 regulated inhibitor of apoptosis 1                        |
| TRIM31   | ENSG00000204616 | tripartite motif containing 31                                 |
| TRIM39   | ENSG00000204599 | tripartite motif containing 39                                 |
| TRIT1    | ENSG00000043514 | tRNA isopentenyltransferase 1                                  |
| TRMT10C  | ENSG00000174173 | tRNA methyltransferase 10C mitochondrial RNase P subunit       |
| TRMT11   | ENSG00000066651 | tRNA methyltransferase 11 homolog                              |
| TRMT2B   | ENSG00000188917 | tRNA methyltransferase 2 homolog B                             |
| TRMT61B  | ENSG00000171103 | tRNA methyltransferase 61B                                     |
| TRMU     | ENSG00000100416 | tRNA mitochondrial 2-thiouridylase                             |
| TRNT1    | ENSG00000072756 | tRNA nucleotidyl transferase 1                                 |
| TRUB2    | ENSG00000167112 | TruB pseudouridine synthase family member 2                    |
| TSFM     | ENSG00000123297 | Ts translation elongation factor mitochondrial                 |
| TSHZ3    | ENSG00000121297 | teashirt zinc finger homeobox 3                                |
| TSPO     | ENSG00000100300 | translocator protein                                           |
| TST      | ENSG00000128311 | thiosulfate sulfurtransferase                                  |
| TSTD3    | ENSG00000279170 | thiosulfate sulfurtransferase like domain containing 3         |
| TTC19    | ENSG00000011295 | tetratricopeptide repeat domain 19                             |
| TTC3     | ENSG00000182670 | tetratricopeptide repeat domain 3                              |
| TUBB3    | ENSG00000258947 | tubulin beta 3 class III                                       |
| TUFM     | ENSG00000178952 | Tu translation elongation factor mitochondrial                 |
| TUSC2    | ENSG00000114383 | tumor suppressor 2 mitochondrial calcium regulator             |
| TUSC3    | ENSG00000104723 | tumor suppressor candidate 3                                   |
| TXN      | ENSG00000136810 | thioredoxin                                                    |
| TXN2     | ENSG00000100348 | thioredoxin 2                                                  |
| TXNDC12  | ENSG00000117862 | thioredoxin domain containing 12                               |
| TXNRD1   | ENSG00000198431 | thioredoxin reductase 1                                        |
| TXNRD2   | ENSG00000184470 | thioredoxin reductase 2                                        |
| TYMS     | ENSG00000176890 | thymidylate synthetase                                         |
| TYSND1   | ENSG00000156521 | trypsin like peroxisomal matrix peptidase 1                    |
| UACA     | ENSG00000137831 | uveal autoantigen with coiled-coil domains and ankyrin repeats |
| UBA1     | ENSG00000130985 | ubiquitin like modifier activating enzyme 1                    |
| UBIAD1   | ENSG00000120942 | UbiA prenyltransferase domain containing 1                     |

|          |                 |                                                                                |
|----------|-----------------|--------------------------------------------------------------------------------|
| UCP1     | ENSG00000109424 | uncoupling protein 1                                                           |
| UCP2     | ENSG00000175567 | uncoupling protein 2                                                           |
| UCP3     | ENSG00000175564 | uncoupling protein 3                                                           |
| UMPS     | ENSG00000114491 | uridine monophosphate synthetase                                               |
| UQCC2    | ENSG00000137288 | ubiquinol-cytochrome c reductase complex assembly factor 2                     |
| UQCR10   | ENSG00000184076 | ubiquinol-cytochrome c reductase complex III subunit X                         |
| UQCR11   | ENSG00000127540 | ubiquinol-cytochrome c reductase complex III subunit XI                        |
| UQCRB    | ENSG00000156467 | ubiquinol-cytochrome c reductase binding protein                               |
| UQCRC1   | ENSG00000010256 | ubiquinol-cytochrome c reductase core protein 1                                |
| UQCRC2   | ENSG00000140740 | ubiquinol-cytochrome c reductase core protein 2                                |
| UQCRFS1  | ENSG00000169021 | ubiquinol-cytochrome c reductase Rieske iron-sulfur polypeptide 1              |
| UQCRH    | ENSG00000173660 | ubiquinol-cytochrome c reductase hinge protein                                 |
| URI1     | ENSG00000105176 | URI1 prefoldin like chaperone                                                  |
| UROS     | ENSG00000188690 | uroporphyrinogen III synthase                                                  |
| USMG5    | ENSG00000173915 | ATP synthase membrane subunit k                                                |
| USP30    | ENSG00000135093 | ubiquitin specific peptidase 30                                                |
| USP48    | ENSG00000090686 | ubiquitin specific peptidase 48                                                |
| UXS1     | ENSG00000115652 | UDP-glucuronate decarboxylase 1                                                |
| VAMP8    | ENSG00000118640 | vesicle associated membrane protein 8                                          |
| VARS     | ENSG00000204394 | valyl-tRNA synthetase 1                                                        |
| VARS2    | ENSG00000137411 | valyl-tRNA synthetase 2 mitochondrial                                          |
| VASN     | ENSG00000168140 | vasorin                                                                        |
| VDAC1    | ENSG00000213585 | voltage dependent anion channel 1                                              |
| VDAC2    | ENSG00000165637 | voltage dependent anion channel 2                                              |
| VDAC3    | ENSG00000078668 | voltage dependent anion channel 3                                              |
| VHL      | ENSG00000134086 | von Hippel-Lindau tumor suppressor                                             |
| VWA8     | ENSG00000102763 | von Willebrand factor A domain containing 8                                    |
| WARS2    | ENSG00000116874 | tryptophanyl tRNA synthetase 2 mitochondrial                                   |
| WDR81    | ENSG00000167716 | WD repeat domain 81                                                            |
| WWOX     | ENSG00000186153 | WW domain containing oxidoreductase                                            |
| XAF1     | ENSG00000132530 | XIAP associated factor 1                                                       |
| XPNPEP3  | ENSG00000196236 | X-prolyl aminopeptidase 3                                                      |
| XRCC3    | ENSG00000126215 | X-ray repair cross complementing 3                                             |
| XRCC6BP1 | ENSG00000166896 | ATP23 metallopeptidase and ATP synthase assembly factor homolog                |
| YARS2    | ENSG00000139131 | tyrosyl-tRNA synthetase 2                                                      |
| YBEY     | ENSG00000182362 | ybeY metalloendornucleinase                                                    |
| YKT6     | ENSG00000106636 | YKT6 v-SNARE homolog                                                           |
| YME1L1   | ENSG00000136758 | YME1 like 1 ATPase                                                             |
| YRDC     | ENSG00000196449 | yrnC N6-threonylcarbamoyltransferase domain containing                         |
| YWHAE    | ENSG00000108953 | tyrosine 3-monooxygenase/tryptophan 5-monooxygenase activation protein epsilon |
| YWHAZ    | ENSG00000164924 | tyrosine 3-monooxygenase/tryptophan 5-monooxygenase activation protein zeta    |
| ZBED8    | ENSG00000221886 | zinc finger BED-type containing 8                                              |
| ZDHHC8   | ENSG00000099904 | zinc finger DHHC-type palmitoyltransferase 8                                   |
| ZFHx3    | ENSG00000140836 | zinc finger homeobox 3                                                         |
| ZMIZ2    | ENSG00000122515 | zinc finger MIZ-type containing 2                                              |
| ZNF428   | ENSG00000131116 | zinc finger protein 428                                                        |

---
