# Supplementary figures and images for: Chagas Disease Megaesophagus Patients Carrying Variant MRPS18B P260A Display Nitro-Oxidative Stress and Mitochondrial Dysfunction in Response to IFN-γ Stimulus
Source: MDPI journal article supplement (doi:10.3390/biomedicines10092215), 2022-09-07

Supplemental Figure S1 : Sanger sequencing chromatograms on CME patients.

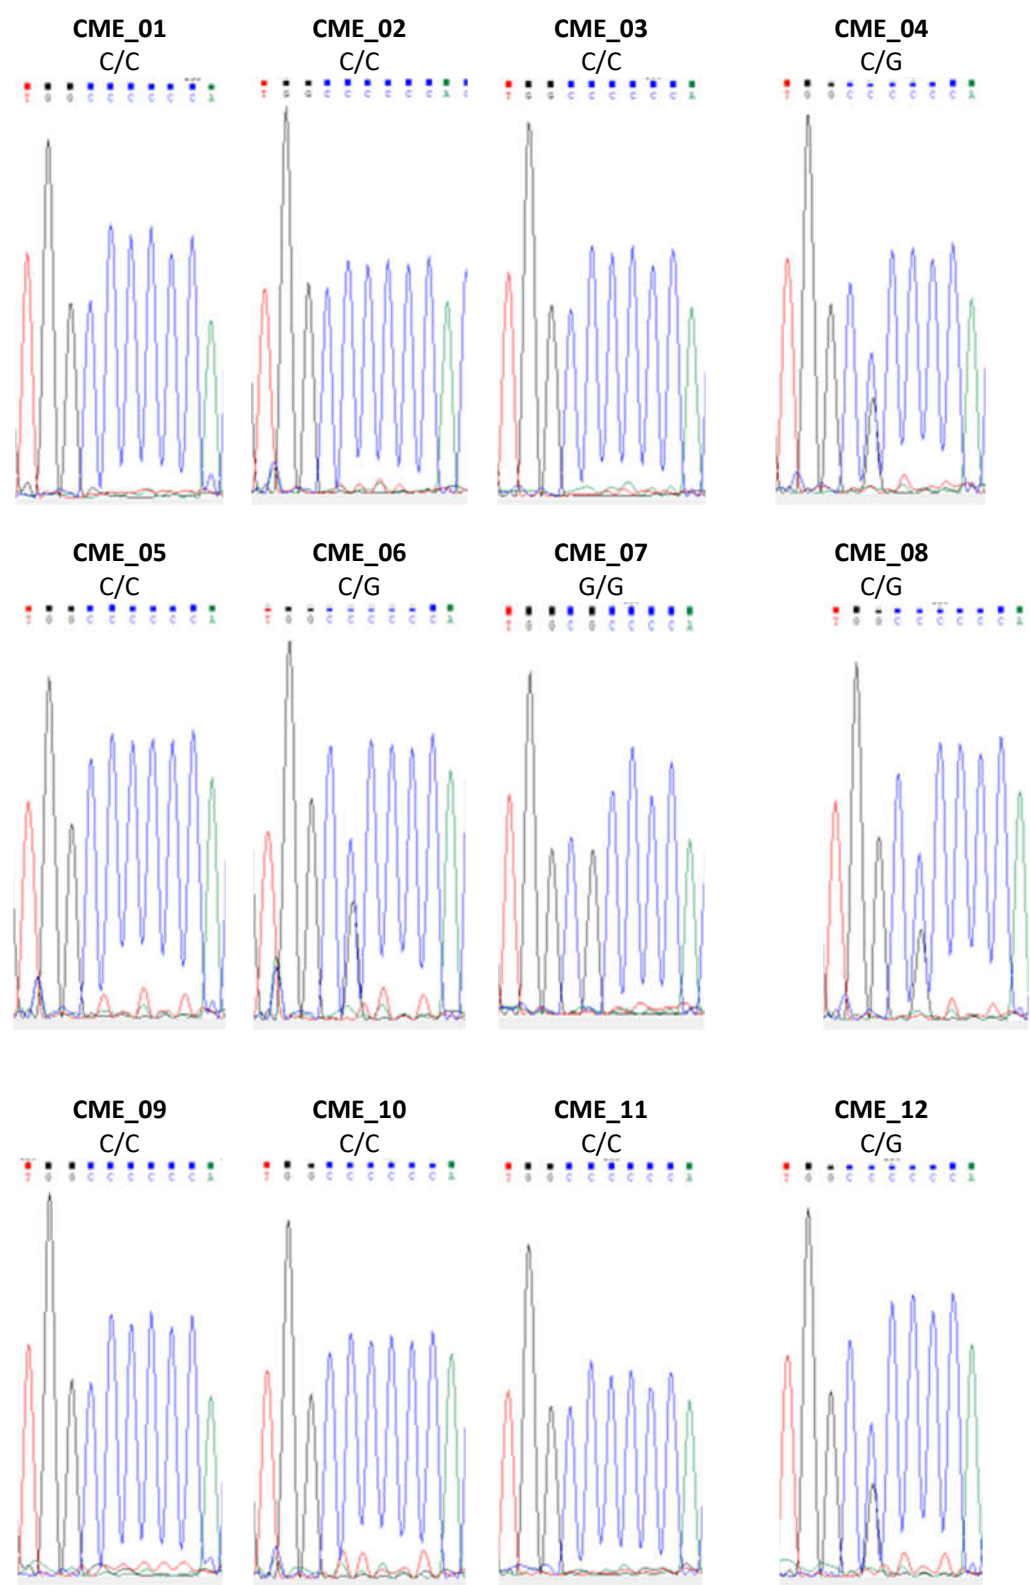

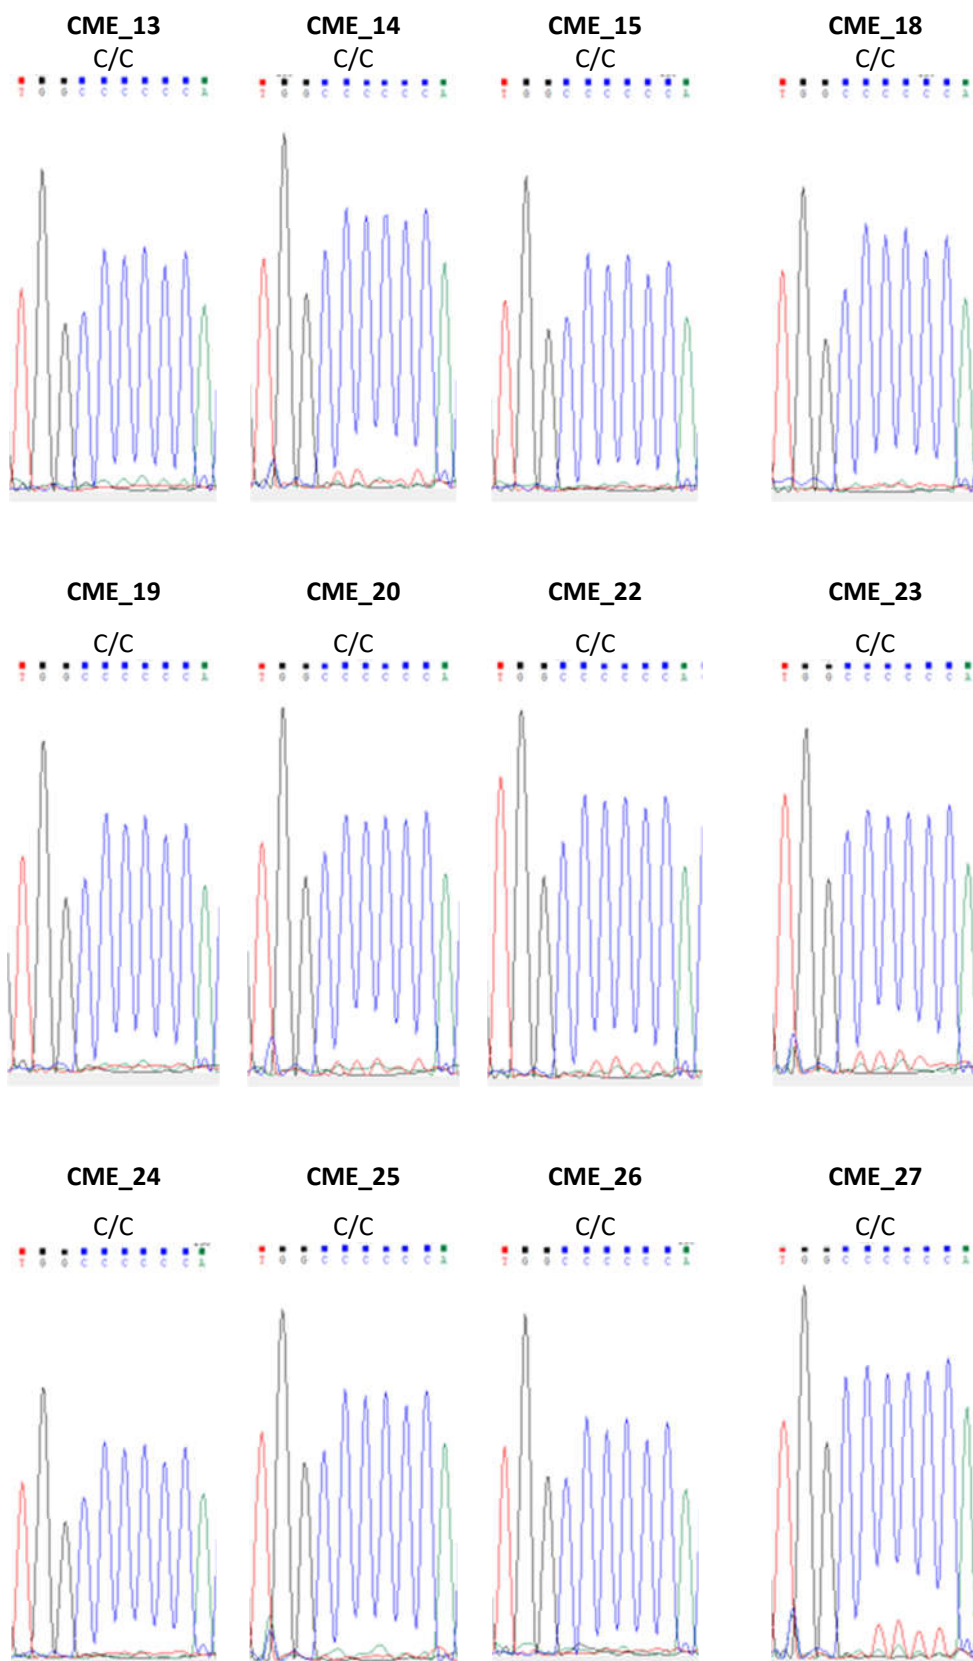

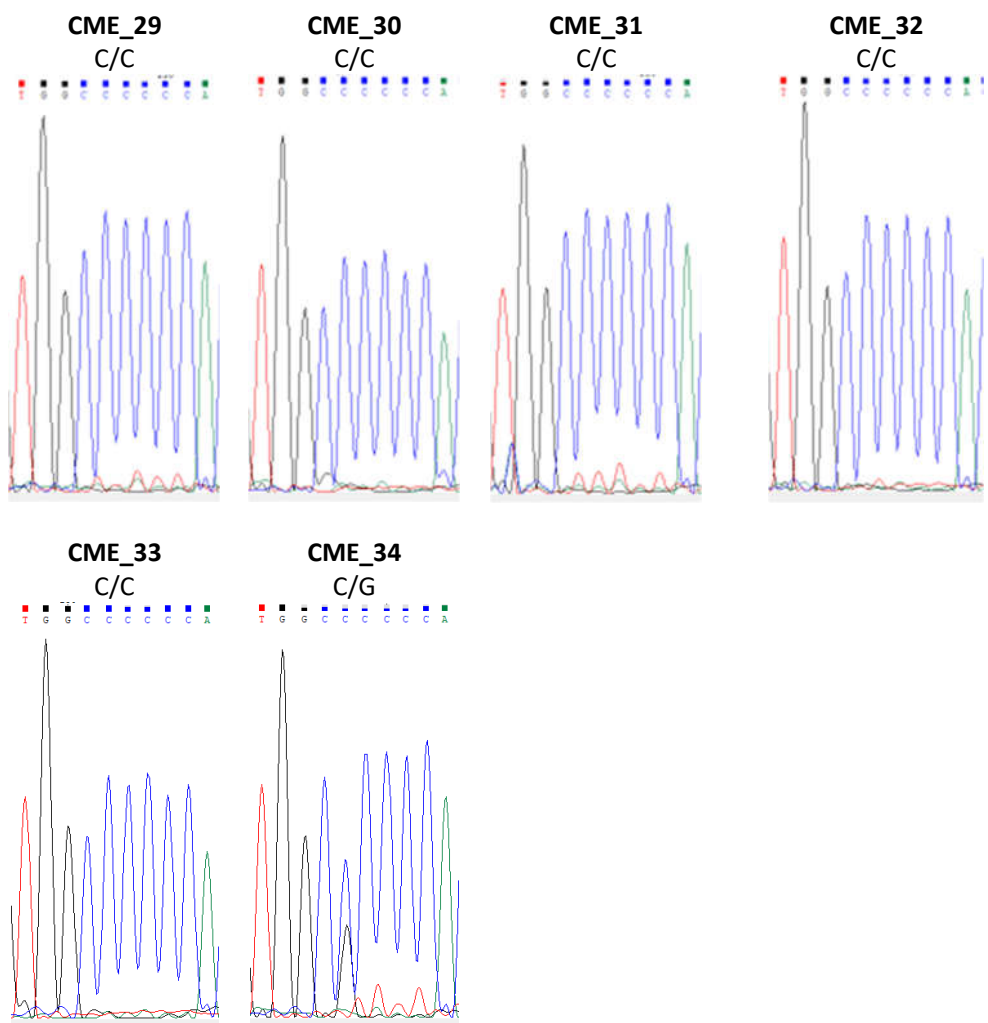

Supplement: s1 [file s1]
